# Supplementary material for: Effects of Host Phylogeny and Habitats on Gut Microbiomes of Oriental River Prawn (Macrobrachium nipponense)
Source: PubMed Central journal article supplement (PMC4500556; doi:10.1371/journal.pone.0132860), 2015-07-13
Supplement: pone.0132860.s003.pdf [file pone.0132860.s003.pdf]

S2 Table. Relative abundance of OTUs of six libraries obtained from shrimp gut.

| OTUID (Genus Name)                   | CRA        | CRc        | TRc        | MLc        | MLs        | SLs        |
|--------------------------------------|------------|------------|------------|------------|------------|------------|
| OTU_1 (unclassified)                 | 0.00000000 | 0.00000000 | 0.17808124 | 0.02214750 | 0.01733600 | 0.04916335 |
| OTU_2 (unclassified)                 | 0.11678379 | 0.00000000 | 0.00000000 | 0.00153498 | 0.00043558 | 0.00079681 |
| OTU_3 (unclassified)                 | 0.12608516 | 0.00016280 | 0.02384583 | 0.00438564 | 0.04852339 | 0.00764940 |
| OTU_4 (Stenotrophomonas)             | 0.01226402 | 0.03882784 | 0.02987661 | 0.02689862 | 0.03066469 | 0.02996016 |
| OTU_5 (Thermus)                      | 0.00516742 | 0.08131868 | 0.03854152 | 0.06037570 | 0.03806952 | 0.05609562 |
| OTU_6 (unclassified)                 | 0.12739424 | 0.00040700 | 0.00000000 | 0.00233901 | 0.00087116 | 0.00039841 |
| OTU_7 (unclassified)                 | 0.00000000 | 0.00333740 | 0.05046444 | 0.01739639 | 0.01210907 | 0.02358566 |
| OTU_8 (unclassified)                 | 0.00082679 | 0.03785104 | 0.01226951 | 0.00979461 | 0.00766617 | 0.00661355 |
| OTU_9 (Vibrio)                       | 0.00000000 | 0.00000000 | 0.00006932 | 0.24581536 | 0.32746755 | 0.32000000 |
| OTU_10 (Flavobacterium)              | 0.00089569 | 0.06959707 | 0.04041314 | 0.02814122 | 0.02839969 | 0.02661355 |
| OTU_11 (unclassified)                | 0.00000000 | 0.00000000 | 0.03604603 | 0.01279146 | 0.00784040 | 0.01466135 |
| OTU_12 (unclassified)                | 0.03355381 | 0.00000000 | 0.00000000 | 0.00080403 | 0.00000000 | 0.00039841 |
| OTU_13 (Asticcacaulis)               | 0.00089569 | 0.00773301 | 0.00908083 | 0.00745560 | 0.00818887 | 0.00940239 |
| OTU_14 (unclassified)                | 0.00013780 | 0.01912902 | 0.00561486 | 0.01096411 | 0.00818887 | 0.01011952 |
| OTU_15 (unclassified)                | 0.00268706 | 0.00398860 | 0.00845695 | 0.00796725 | 0.00845021 | 0.00701195 |
| OTU_16 (Streptophyta)                | 0.00020670 | 0.01066341 | 0.00866491 | 0.00665156 | 0.00958272 | 0.00828685 |
| OTU_17 (Geobacillus)                 | 0.00613201 | 0.01538462 | 0.01254679 | 0.01534976 | 0.00958272 | 0.01498008 |
| OTU_18 (Cryobacterium)               | 0.00062009 | 0.02246642 | 0.01434909 | 0.01227980 | 0.01045387 | 0.02318725 |
| OTU_19 (unclassified)                | 0.02418355 | 0.00000000 | 0.00000000 | 0.00014619 | 0.00008712 | 0.00039841 |
| OTU_20 (unclassified)                | 0.01398650 | 0.00000000 | 0.00201026 | 0.00051166 | 0.00087116 | 0.00167331 |
| OTU_21 (Lactobacillus)               | 0.00875017 | 0.02612943 | 0.03479828 | 0.01578832 | 0.01367715 | 0.01593625 |
| OTU_22 (Propionibacterium)           | 0.00089569 | 0.00602361 | 0.01233883 | 0.00416636 | 0.00453001 | 0.00677291 |
| OTU_23 (unclassified)                | 0.00000000 | 0.00000000 | 0.02065715 | 0.00621300 | 0.00174231 | 0.00988048 |
| OTU_24 (Tetragenococcus)             | 0.00757889 | 0.03606024 | 0.02849023 | 0.01315693 | 0.00810175 | 0.00948207 |
| OTU_25 (unclassified)                | 0.01260852 | 0.00000000 | 0.00000000 | 0.00043856 | 0.00000000 | 0.00000000 |
| OTU_26 (Pseudomonas)                 | 0.00124018 | 0.00398860 | 0.00443643 | 0.00285067 | 0.00139385 | 0.00207171 |
| OTU_27 (unclassified)                | 0.01694915 | 0.00000000 | 0.00000000 | 0.00021928 | 0.00000000 | 0.00000000 |
| OTU_28 (Acidovorax)                  | 0.00013780 | 0.01579162 | 0.00956606 | 0.00862510 | 0.00592386 | 0.00772908 |
| OTU_29 (Curvibacter)                 | 0.00027560 | 0.01286121 | 0.00616942 | 0.00555515 | 0.00444290 | 0.00621514 |
| OTU_30 (Ralstonia)                   | 0.00137798 | 0.00724461 | 0.00561486 | 0.00380089 | 0.00383309 | 0.00462151 |
| OTU_31 (Sphingomonas)                | 0.00027560 | 0.01196581 | 0.00686261 | 0.01016008 | 0.00566251 | 0.00741036 |
| OTU_32                               | 0.00165358 | 0.00740741 | 0.00436711 | 0.00613990 | 0.00278770 | 0.00525896 |
| OTU_33 (Flavobacterium)              | 0.00000000 | 0.00960521 | 0.00873423 | 0.00445874 | 0.00331039 | 0.00358566 |
| OTU_34<br>(TM7_genus_incertae_sedis) | 0.00813008 | 0.00000000 | 0.00000000 | 0.00043856 | 0.00000000 | 0.00015936 |
| OTU_35 (Rhodobacter)                 | 0.00916357 | 0.00024420 | 0.00000000 | 0.00007309 | 0.00000000 | 0.00000000 |
| OTU_36 (Serratia)                    | 0.00117128 | 0.01188441 | 0.00256481 | 0.00482421 | 0.00548828 | 0.00525896 |
| OTU_37 (unclassified)                | 0.01391760 | 0.00000000 | 0.00000000 | 0.00058475 | 0.00000000 | 0.00000000 |
| OTU_38 (unclassified)                | 0.00985256 | 0.00000000 | 0.00000000 | 0.00138879 | 0.00008712 | 0.00000000 |
| OTU_39 (unclassified)                | 0.00006890 | 0.00830281 | 0.00325801 | 0.00365470 | 0.00278770 | 0.00294821 |
| OTU_40<br>(TM7_genus_incertae_sedis) | 0.00000000 | 0.00757021 | 0.00000000 | 0.00000000 | 0.00034846 | 0.00000000 |
| OTU_41 (unclassified)                | 0.00027560 | 0.00529101 | 0.00180230 | 0.00168116 | 0.00270058 | 0.00135458 |
| OTU_42 (Spirosoma)                   | 0.00000000 | 0.00748881 | 0.00547622 | 0.00306995 | 0.00278770 | 0.00334661 |
| OTU_43 (unclassified)                | 0.00013780 | 0.00008140 | 0.01774574 | 0.00087713 | 0.00069692 | 0.00278884 |
| OTU_44 (Methylobacterium)            | 0.00055119 | 0.00618641 | 0.00817968 | 0.00628609 | 0.00627232 | 0.01035857 |
| OTU_45 (unclassified)                | 0.01446879 | 0.00008140 | 0.00000000 | 0.00065785 | 0.00034846 | 0.00000000 |
| OTU_46 (Methylobacterium)            | 0.00000000 | 0.00480260 | 0.00124775 | 0.00095022 | 0.00026135 | 0.00127490 |
| OTU_47 (unclassified)                | 0.00006890 | 0.00919821 | 0.00263413 | 0.00204663 | 0.00235212 | 0.00223108 |
| OTU_48 (unclassified)                | 0.00000000 | 0.00284900 | 0.00388188 | 0.00175426 | 0.00148097 | 0.00199203 |

|                                      |            |            |            |            |            |            |
|--------------------------------------|------------|------------|------------|------------|------------|------------|
| OTU_49 (Aeribacillus)                | 0.00103348 | 0.00748881 | 0.00395120 | 0.01111030 | 0.00827598 | 0.00653386 |
| OTU_50 (Lactobacillus)               | 0.00103348 | 0.00618641 | 0.00311937 | 0.00160807 | 0.00209077 | 0.00095618 |
| OTU_51 (GpXI)                        | 0.00000000 | 0.00317460 | 0.00173298 | 0.00095022 | 0.00026135 | 0.00087649 |
| OTU_52 (Meiothermus)                 | 0.00020670 | 0.00284900 | 0.00166366 | 0.00168116 | 0.00130673 | 0.00159363 |
| OTU_53 (unclassified)                | 0.00000000 | 0.00000000 | 0.00436711 | 0.00109641 | 0.00139385 | 0.00326693 |
| OTU_54 (Methylobacterium)            | 0.00020670 | 0.00130240 | 0.00159434 | 0.00087713 | 0.00043558 | 0.00111554 |
| OTU_55 (unclassified)                | 0.00000000 | 0.00529101 | 0.00173298 | 0.00219282 | 0.00121962 | 0.00063745 |
| OTU_56 (Ilumatobacter)               | 0.01095494 | 0.00000000 | 0.00000000 | 0.00029238 | 0.00000000 | 0.00007968 |
| OTU_57 (unclassified)                | 0.00489183 | 0.00000000 | 0.00000000 | 0.00029238 | 0.00339751 | 0.00000000 |
| OTU_58 (unclassified)                | 0.00000000 | 0.00757021 | 0.00415916 | 0.00277757 | 0.00243924 | 0.00167331 |
| OTU_59 (Ilumatobacter)               | 0.00523632 | 0.00056980 | 0.00027728 | 0.00000000 | 0.00008712 | 0.00000000 |
| OTU_60<br>(OD1_genus_incertae_sedis) | 0.00000000 | 0.00602361 | 0.00263413 | 0.00387399 | 0.00139385 | 0.00135458 |
| OTU_61 (Cupriavidus)                 | 0.00068899 | 0.00309320 | 0.00270345 | 0.00328923 | 0.00130673 | 0.00183267 |
| OTU_62 (unclassified)                | 0.00062009 | 0.00358160 | 0.00138639 | 0.00109641 | 0.00130673 | 0.00063745 |
| OTU_63 (Flavobacterium)              | 0.00392724 | 0.00000000 | 0.00000000 | 0.00000000 | 0.00000000 | 0.00000000 |
| OTU_64 (Lactobacillus)               | 0.00000000 | 0.00000000 | 0.00000000 | 0.01293765 | 0.04338357 | 0.00000000 |
| OTU_65 (Microbacterium)              | 0.00013780 | 0.00504681 | 0.00305005 | 0.00138879 | 0.00034846 | 0.00294821 |
| OTU_66 (unclassified)                | 0.00000000 | 0.00423280 | 0.00173298 | 0.00058475 | 0.00104539 | 0.00063745 |
| OTU_67 (unclassified)                | 0.01522668 | 0.00000000 | 0.00000000 | 0.00058475 | 0.00000000 | 0.00000000 |
| OTU_68 (unclassified)                | 0.00000000 | 0.00529101 | 0.00180230 | 0.00175426 | 0.00087116 | 0.00095618 |
| OTU_69 (Polynucleobacter)            | 0.00020670 | 0.00480260 | 0.00478303 | 0.00241210 | 0.00226501 | 0.00438247 |
| OTU_70 (Aeromonas)                   | 0.00020670 | 0.00000000 | 0.02058783 | 0.03640085 | 0.03153585 | 0.01155378 |
| OTU_71 (Caldicellulosiruptor)        | 0.00075789 | 0.00219780 | 0.00547622 | 0.00416636 | 0.00235212 | 0.00509960 |
| OTU_72 (unclassified)                | 0.00020670 | 0.00667481 | 0.00402052 | 0.00175426 | 0.00104539 | 0.00143426 |
| OTU_73 (unclassified)                | 0.00399614 | 0.00000000 | 0.00000000 | 0.00036547 | 0.00017423 | 0.00000000 |
| OTU_74 (unclassified)                | 0.00516742 | 0.00032560 | 0.00000000 | 0.00043856 | 0.00000000 | 0.00015936 |
| OTU_75 (unclassified)                | 0.00626981 | 0.00000000 | 0.00000000 | 0.00000000 | 0.00000000 | 0.00007968 |
| OTU_76 (unclassified)                | 0.00013780 | 0.00284900 | 0.00187162 | 0.00021928 | 0.00000000 | 0.00095618 |
| OTU_77 (Acinetobacter)               | 0.00013780 | 0.00284900 | 0.00277277 | 0.00160807 | 0.00156808 | 0.00119522 |
| OTU_78 (Paracoccus)                  | 0.02197878 | 0.00000000 | 0.00000000 | 0.00087713 | 0.00008712 | 0.00071713 |
| OTU_79 (unclassified)                | 0.00496073 | 0.00000000 | 0.00000000 | 0.00000000 | 0.00000000 | 0.00000000 |
| OTU_80 (unclassified)                | 0.00303156 | 0.00000000 | 0.00000000 | 0.00000000 | 0.00000000 | 0.00000000 |
| OTU_81 (Bdellovibrio)                | 0.00000000 | 0.00227920 | 0.00228754 | 0.00051166 | 0.00095827 | 0.00127490 |
| OTU_82 (unclassified)                | 0.00117128 | 0.00366300 | 0.00083183 | 0.00124260 | 0.00000000 | 0.00007968 |
| OTU_83 (unclassified)                | 0.00006890 | 0.00236060 | 0.00187162 | 0.00248520 | 0.00121962 | 0.00159363 |
| OTU_84 (unclassified)                | 0.00000000 | 0.00130240 | 0.00194094 | 0.00021928 | 0.00034846 | 0.00079681 |
| OTU_85 (Burkholderia)                | 0.00034449 | 0.00179080 | 0.00117843 | 0.00095022 | 0.00174231 | 0.00111554 |
| OTU_86 (unclassified)                | 0.00000000 | 0.00219780 | 0.00187162 | 0.00095022 | 0.00104539 | 0.00119522 |
| OTU_87 (unclassified)                | 0.00006890 | 0.00227920 | 0.00187162 | 0.00146188 | 0.00052269 | 0.00079681 |
| OTU_88 (Ilumatobacter)               | 0.00130908 | 0.00097680 | 0.00076251 | 0.00029238 | 0.00034846 | 0.00031873 |
| OTU_89 (unclassified)                | 0.00716550 | 0.00056980 | 0.00034660 | 0.00080403 | 0.00026135 | 0.00039841 |
| OTU_90 (Flavobacterium)              | 0.00000000 | 0.00000000 | 0.00436711 | 0.00051166 | 0.00060981 | 0.00143426 |
| OTU_91 (Anoxybacillus)               | 0.00137798 | 0.00227920 | 0.00090115 | 0.00087713 | 0.00130673 | 0.00135458 |
| OTU_92 (unclassified)                | 0.00227367 | 0.00048840 | 0.00000000 | 0.00021928 | 0.00008712 | 0.00000000 |
| OTU_93 (Bacillus)                    | 0.00303156 | 0.00431420 | 0.00492167 | 0.00285067 | 0.00322328 | 0.00446215 |
| OTU_94 (unclassified)                | 0.00723439 | 0.00000000 | 0.00000000 | 0.00036547 | 0.00000000 | 0.00000000 |
| OTU_95 (Chryseobacterium)            | 0.00013780 | 0.00398860 | 0.00187162 | 0.00080403 | 0.00043558 | 0.00047809 |
| OTU_96 (unclassified)                | 0.00737219 | 0.00056980 | 0.00034660 | 0.00014619 | 0.00008712 | 0.00015936 |
| OTU_97 (Acinetobacter)               | 0.00296266 | 0.00870981 | 0.00769444 | 0.00248520 | 0.00243924 | 0.00302789 |
| OTU_98 (unclassified)                | 0.00675210 | 0.00000000 | 0.00000000 | 0.00014619 | 0.00008712 | 0.00000000 |

|                                       |            |            |            |            |            |            |
|---------------------------------------|------------|------------|------------|------------|------------|------------|
| OTU_99 (unclassified)                 | 0.00358275 | 0.00195360 | 0.00027728 | 0.00000000 | 0.00000000 | 0.00000000 |
| OTU_100<br>(TM7_genus_incertae_sedis) | 0.00282486 | 0.00000000 | 0.00000000 | 0.00000000 | 0.00000000 | 0.00000000 |
| OTU_101 (Ilumatobacter)               | 0.00509853 | 0.00000000 | 0.00000000 | 0.00000000 | 0.00000000 | 0.00000000 |
| OTU_102 (Zimmermannella)              | 0.00041339 | 0.00105820 | 0.00270345 | 0.00197354 | 0.00165520 | 0.00223108 |
| OTU_103 (Cetobacterium)               | 0.00537412 | 0.00000000 | 0.00000000 | 0.00058475 | 0.00008712 | 0.00007968 |
| OTU_104 (unclassified)                | 0.00399614 | 0.00000000 | 0.00000000 | 0.00007309 | 0.00008712 | 0.00015936 |
| OTU_105 (Legionella)                  | 0.00365165 | 0.00065120 | 0.00000000 | 0.00007309 | 0.00000000 | 0.00000000 |
| OTU_106<br>(TM7_genus_incertae_sedis) | 0.00000000 | 0.00219780 | 0.00117843 | 0.00058475 | 0.00043558 | 0.00047809 |
| OTU_107 (unclassified)                | 0.00000000 | 0.00260480 | 0.00027728 | 0.00021928 | 0.00043558 | 0.00047809 |
| OTU_108 (Shewanella)                  | 0.00620091 | 0.00000000 | 0.00000000 | 0.00314305 | 0.00766617 | 0.00031873 |
| OTU_109 (Chryseobacterium)            | 0.00000000 | 0.00252340 | 0.00076251 | 0.00073094 | 0.00034846 | 0.00031873 |
| OTU_110<br>(TM7_genus_incertae_sedis) | 0.00000000 | 0.00016280 | 0.00207958 | 0.00073094 | 0.00087116 | 0.00071713 |
| OTU_111 (Microcella)                  | 0.00289376 | 0.00016280 | 0.00000000 | 0.00000000 | 0.00008712 | 0.00000000 |
| OTU_112 (Rhizobium)                   | 0.00778559 | 0.00000000 | 0.00000000 | 0.00000000 | 0.00000000 | 0.00000000 |
| OTU_113 (unclassified)                | 0.00000000 | 0.00179080 | 0.00041592 | 0.00000000 | 0.00008712 | 0.00000000 |
| OTU_114 (unclassified)                | 0.00000000 | 0.00122100 | 0.00103979 | 0.00007309 | 0.00026135 | 0.00047809 |
| OTU_115 (unclassified)                | 0.00000000 | 0.00122100 | 0.00048523 | 0.00043856 | 0.00017423 | 0.00015936 |
| OTU_116 (Lactobacillus)               | 0.00124018 | 0.00781441 | 0.00429780 | 0.00358161 | 0.00130673 | 0.00135458 |
| OTU_117 (unclassified)                | 0.00316935 | 0.00000000 | 0.00000000 | 0.00000000 | 0.00000000 | 0.00000000 |
| OTU_118 (unclassified)                | 0.00275596 | 0.00000000 | 0.00000000 | 0.00014619 | 0.00000000 | 0.00000000 |
| OTU_119 (unclassified)                | 0.00254926 | 0.00000000 | 0.00000000 | 0.00000000 | 0.00000000 | 0.00000000 |
| OTU_120 (unclassified)                | 0.00310045 | 0.00000000 | 0.00000000 | 0.00000000 | 0.00000000 | 0.00007968 |
| OTU_121 (unclassified)                | 0.00806118 | 0.00008140 | 0.00000000 | 0.00000000 | 0.00000000 | 0.00007968 |
| OTU_122 (Geobacillus)                 | 0.00068899 | 0.00089540 | 0.00256481 | 0.00131569 | 0.00139385 | 0.00262948 |
| OTU_123 (unclassified)                | 0.00041339 | 0.00065120 | 0.00069319 | 0.00021928 | 0.00060981 | 0.00000000 |
| OTU_124 (unclassified)                | 0.00303156 | 0.00008140 | 0.00000000 | 0.00000000 | 0.00000000 | 0.00000000 |
| OTU_125 (Pelomonas)                   | 0.00000000 | 0.00358160 | 0.00117843 | 0.00138879 | 0.00052269 | 0.00119522 |
| OTU_126 (Thermus)                     | 0.00013780 | 0.00586081 | 0.00187162 | 0.02002778 | 0.01437407 | 0.02000000 |
| OTU_127 (Ilumatobacter)               | 0.00248036 | 0.00000000 | 0.00000000 | 0.00000000 | 0.00000000 | 0.00000000 |
| OTU_128 (unclassified)                | 0.00000000 | 0.00293040 | 0.00097047 | 0.00036547 | 0.00000000 | 0.00023904 |
| OTU_129 (Flavobacterium)              | 0.00000000 | 0.00236060 | 0.00048523 | 0.00007309 | 0.00000000 | 0.00023904 |
| OTU_130 (unclassified)                | 0.00144688 | 0.00000000 | 0.00000000 | 0.00007309 | 0.00000000 | 0.00000000 |
| OTU_131 (unclassified)                | 0.00151578 | 0.00000000 | 0.00000000 | 0.00058475 | 0.00000000 | 0.00015936 |
| OTU_132 (unclassified)                | 0.00062009 | 0.00301180 | 0.00110911 | 0.00409327 | 0.00522694 | 0.00446215 |
| OTU_133 (Deinococcus)                 | 0.00068899 | 0.00260480 | 0.00214890 | 0.00102332 | 0.00182943 | 0.00247012 |
| OTU_134 (unclassified)                | 0.00372055 | 0.00000000 | 0.00000000 | 0.00000000 | 0.00008712 | 0.00000000 |
| OTU_135 (Rhodococcus)                 | 0.00006890 | 0.00105820 | 0.00062387 | 0.00087713 | 0.00026135 | 0.00023904 |
| OTU_136 (Arcicella)                   | 0.00006890 | 0.00081400 | 0.00110911 | 0.00182735 | 0.00052269 | 0.00055777 |
| OTU_137 (Burkholderia)                | 0.00055119 | 0.00195360 | 0.00228754 | 0.00248520 | 0.00374597 | 0.00342629 |
| OTU_138 (unclassified)                | 0.00000000 | 0.00105820 | 0.00076251 | 0.00014619 | 0.00000000 | 0.00007968 |
| OTU_139 (Thermus)                     | 0.00013780 | 0.00138380 | 0.00159434 | 0.00007309 | 0.00034846 | 0.00143426 |
| OTU_140 (Micrococcus)                 | 0.00020670 | 0.00040700 | 0.00117843 | 0.00029238 | 0.00078404 | 0.00119522 |
| OTU_141 (unclassified)                | 0.00000000 | 0.00073260 | 0.00034660 | 0.00029238 | 0.00043558 | 0.00007968 |
| OTU_142 (unclassified)                | 0.00034449 | 0.00073260 | 0.00027728 | 0.00102332 | 0.00008712 | 0.00000000 |
| OTU_143<br>(OD1_genus_incertae_sedis) | 0.00000000 | 0.00195360 | 0.00041592 | 0.00116951 | 0.00087116 | 0.00023904 |
| OTU_144 (Sphingomonas)                | 0.00027560 | 0.00000000 | 0.00076251 | 0.00007309 | 0.00017423 | 0.00015936 |
| OTU_145 (unclassified)                | 0.00000000 | 0.00293040 | 0.00048523 | 0.00036547 | 0.00000000 | 0.00023904 |

|                                          |            |            |            |            |            |            |
|------------------------------------------|------------|------------|------------|------------|------------|------------|
| OTU_146 (unclassified)                   | 0.00027560 | 0.00203500 | 0.00055455 | 0.00058475 | 0.00008712 | 0.00023904 |
| OTU_147 (Lactobacillus)                  | 0.00062009 | 0.00268620 | 0.00318869 | 0.00182735 | 0.00043558 | 0.00135458 |
| OTU_148 (Bacillariophyta)                | 0.00000000 | 0.00341880 | 0.00173298 | 0.00058475 | 0.00052269 | 0.00055777 |
| OTU_149 (unclassified)                   | 0.00000000 | 0.00089540 | 0.00083183 | 0.00021928 | 0.00017423 | 0.00031873 |
| OTU_150 (unclassified)                   | 0.00000000 | 0.00162800 | 0.00062387 | 0.00036547 | 0.00043558 | 0.00039841 |
| OTU_151 (Rhodobacter)                    | 0.00833678 | 0.00024420 | 0.00020796 | 0.00065785 | 0.00000000 | 0.00007968 |
| OTU_152 (Bradyrhizobium)                 | 0.00192917 | 0.00390720 | 0.00298073 | 0.00336233 | 0.00113250 | 0.00239044 |
| OTU_153 (unclassified)                   | 0.00000000 | 0.00056980 | 0.00041592 | 0.00000000 | 0.00000000 | 0.00007968 |
| OTU_154 (Flavobacterium)                 | 0.00020670 | 0.00113960 | 0.00041592 | 0.00007309 | 0.00008712 | 0.00000000 |
| OTU_155 (unclassified)                   | 0.00144688 | 0.00016280 | 0.00000000 | 0.00000000 | 0.00026135 | 0.00000000 |
| OTU_156 (unclassified)                   | 0.00027560 | 0.00056980 | 0.00090115 | 0.00029238 | 0.00017423 | 0.00023904 |
| OTU_157 (unclassified)                   | 0.00000000 | 0.00024420 | 0.00117843 | 0.00058475 | 0.00026135 | 0.00087649 |
| OTU_158 (unclassified)                   | 0.00000000 | 0.00170940 | 0.00076251 | 0.00124260 | 0.00113250 | 0.00055777 |
| OTU_159 (unclassified)                   | 0.00000000 | 0.00350020 | 0.00090115 | 0.00095022 | 0.00078404 | 0.00071713 |
| OTU_160 (unclassified)                   | 0.00213587 | 0.00000000 | 0.00000000 | 0.00000000 | 0.00000000 | 0.00000000 |
| OTU_161 (Novosphingobium)                | 0.00027560 | 0.00105820 | 0.00034660 | 0.00073094 | 0.00043558 | 0.00023904 |
| OTU_162 (Methylotenera)                  | 0.00000000 | 0.00472120 | 0.00138639 | 0.00073094 | 0.00069692 | 0.00055777 |
| OTU_163 (Microbacterium)                 | 0.00117128 | 0.00000000 | 0.00000000 | 0.00000000 | 0.00000000 | 0.00000000 |
| OTU_164 (unclassified)                   | 0.00000000 | 0.00000000 | 0.00103979 | 0.00000000 | 0.00000000 | 0.00023904 |
| OTU_165 (unclassified)                   | 0.00013780 | 0.00040700 | 0.00062387 | 0.00000000 | 0.00034846 | 0.00007968 |
| OTU_166 (unclassified)                   | 0.00165358 | 0.00000000 | 0.00000000 | 0.00000000 | 0.00000000 | 0.00000000 |
| OTU_167 (Arthrobacter)                   | 0.00000000 | 0.00146520 | 0.00062387 | 0.00095022 | 0.00043558 | 0.00079681 |
| OTU_168 (unclassified)                   | 0.00165358 | 0.00000000 | 0.00000000 | 0.00014619 | 0.00000000 | 0.00000000 |
| OTU_169 (unclassified)                   | 0.00241146 | 0.00000000 | 0.00000000 | 0.00000000 | 0.00000000 | 0.00007968 |
| OTU_170 (Roseomonas)                     | 0.00165358 | 0.00000000 | 0.00000000 | 0.00000000 | 0.00000000 | 0.00000000 |
| OTU_171 (Corynebacterium)                | 0.00048229 | 0.00000000 | 0.00124775 | 0.00131569 | 0.00217789 | 0.00063745 |
| OTU_172<br>(TM7_genus_incertainae_sedis) | 0.00000000 | 0.00089540 | 0.00020796 | 0.00051166 | 0.00008712 | 0.00007968 |
| OTU_173<br>(TM7_genus_incertainae_sedis) | 0.00096459 | 0.00000000 | 0.00000000 | 0.00000000 | 0.00000000 | 0.00000000 |
| OTU_174 (Clostridium_XI)                 | 0.00172247 | 0.00000000 | 0.00000000 | 0.00000000 | 0.00000000 | 0.00000000 |
| OTU_175 (unclassified)                   | 0.00000000 | 0.00195360 | 0.00041592 | 0.00095022 | 0.00052269 | 0.00159363 |
| OTU_176 (Microbacterium)                 | 0.00034449 | 0.00024420 | 0.00062387 | 0.00007309 | 0.00017423 | 0.00047809 |
| OTU_177 (unclassified)                   | 0.00006890 | 0.00146520 | 0.00000000 | 0.00000000 | 0.00008712 | 0.00000000 |
| OTU_178 (unclassified)                   | 0.00006890 | 0.00000000 | 0.00055455 | 0.00000000 | 0.00000000 | 0.00007968 |
| OTU_179 (unclassified)                   | 0.00000000 | 0.00000000 | 0.00062387 | 0.00007309 | 0.00026135 | 0.00023904 |
| OTU_180 (unclassified)                   | 0.00427174 | 0.00008140 | 0.00000000 | 0.00007309 | 0.00000000 | 0.00000000 |
| OTU_181<br>(TM7_genus_incertainae_sedis) | 0.00000000 | 0.00000000 | 0.00152502 | 0.00000000 | 0.00000000 | 0.00000000 |
| OTU_182 (unclassified)                   | 0.00124018 | 0.00000000 | 0.00000000 | 0.00000000 | 0.00000000 | 0.00000000 |
| OTU_183 (Sphingomonas)                   | 0.00000000 | 0.00000000 | 0.00000000 | 0.00116951 | 0.00095827 | 0.00215139 |
| OTU_184 (unclassified)                   | 0.00110238 | 0.00000000 | 0.00000000 | 0.00000000 | 0.00000000 | 0.00000000 |
| OTU_185<br>(OD1_genus_incertainae_sedis) | 0.00000000 | 0.00154660 | 0.00020796 | 0.00000000 | 0.00017423 | 0.00031873 |
| OTU_186<br>(TM7_genus_incertainae_sedis) | 0.00020670 | 0.00073260 | 0.00027728 | 0.00000000 | 0.00008712 | 0.00007968 |
| OTU_187 (unclassified)                   | 0.00020670 | 0.00122100 | 0.00000000 | 0.00065785 | 0.00078404 | 0.00031873 |
| OTU_188 (Nubsella)                       | 0.00000000 | 0.00154660 | 0.00069319 | 0.00036547 | 0.00026135 | 0.00031873 |
| OTU_189 (Roseococcus)                    | 0.00248036 | 0.00000000 | 0.00000000 | 0.00000000 | 0.00000000 | 0.00000000 |
| OTU_190 (Bacillus)                       | 0.00062009 | 0.00227920 | 0.00180230 | 0.00109641 | 0.00060981 | 0.00111554 |
| OTU_191 (unclassified)                   | 0.00172247 | 0.00016280 | 0.00083183 | 0.00029238 | 0.00017423 | 0.00047809 |

|                                       |            |            |            |            |            |            |
|---------------------------------------|------------|------------|------------|------------|------------|------------|
| OTU_192<br>(TM7_genus_incertae_sedis) | 0.00000000 | 0.00105820 | 0.00083183 | 0.00007309 | 0.00017423 | 0.00015936 |
| OTU_193 (unclassified)                | 0.00206697 | 0.00000000 | 0.00000000 | 0.00021928 | 0.00174231 | 0.00071713 |
| OTU_194 (Caldicellulosiruptor)        | 0.00041339 | 0.00065120 | 0.00131707 | 0.00116951 | 0.00139385 | 0.00175299 |
| OTU_195<br>(SR1_genus_incertae_sedis) | 0.00041339 | 0.00097680 | 0.00076251 | 0.00007309 | 0.00000000 | 0.00039841 |
| OTU_196 (unclassified)                | 0.00220477 | 0.00016280 | 0.00006932 | 0.00007309 | 0.00000000 | 0.00000000 |
| OTU_197 (Erythrobacter)               | 0.00000000 | 0.00016280 | 0.00062387 | 0.00036547 | 0.00008712 | 0.00031873 |
| OTU_198 (unclassified)                | 0.00055119 | 0.00081400 | 0.00076251 | 0.00000000 | 0.00000000 | 0.00007968 |
| OTU_199 (unclassified)                | 0.00199807 | 0.00000000 | 0.00000000 | 0.00000000 | 0.00000000 | 0.00000000 |
| OTU_200 (Rudaea)                      | 0.00000000 | 0.00000000 | 0.00090115 | 0.00000000 | 0.00017423 | 0.00023904 |
| OTU_201 (unclassified)                | 0.00000000 | 0.00065120 | 0.00041592 | 0.00007309 | 0.00000000 | 0.00000000 |
| OTU_202 (unclassified)                | 0.00220477 | 0.00000000 | 0.00000000 | 0.00000000 | 0.00008712 | 0.00000000 |
| OTU_203 (unclassified)                | 0.00124018 | 0.00008140 | 0.00000000 | 0.00000000 | 0.00000000 | 0.00000000 |
| OTU_204 (unclassified)                | 0.00186027 | 0.00000000 | 0.00000000 | 0.00029238 | 0.00000000 | 0.00000000 |
| OTU_205 (unclassified)                | 0.00000000 | 0.00227920 | 0.00027728 | 0.00021928 | 0.00026135 | 0.00039841 |
| OTU_206 (unclassified)                | 0.00110238 | 0.00000000 | 0.00000000 | 0.00000000 | 0.00000000 | 0.00000000 |
| OTU_207 (unclassified)                | 0.00000000 | 0.00105820 | 0.00013864 | 0.00051166 | 0.00017423 | 0.00015936 |
| OTU_208 (unclassified)                | 0.00000000 | 0.00325600 | 0.00194094 | 0.00051166 | 0.00026135 | 0.00031873 |
| OTU_209 (unclassified)                | 0.00082679 | 0.00000000 | 0.00000000 | 0.00014619 | 0.00000000 | 0.00000000 |
| OTU_210 (Janthinobacterium)           | 0.00000000 | 0.00097680 | 0.00083183 | 0.00095022 | 0.00008712 | 0.00111554 |
| OTU_211 (Sphingobium)                 | 0.00000000 | 0.00146520 | 0.00000000 | 0.00007309 | 0.00017423 | 0.00087649 |
| OTU_212 (Comamonas)                   | 0.00000000 | 0.00113960 | 0.00069319 | 0.00029238 | 0.00000000 | 0.00023904 |
| OTU_213 (Ilumatobacter)               | 0.00206697 | 0.00016280 | 0.00000000 | 0.00000000 | 0.00000000 | 0.00023904 |
| OTU_214 (unclassified)                | 0.00158468 | 0.00000000 | 0.00000000 | 0.00000000 | 0.00000000 | 0.00000000 |
| OTU_215 (Bacillus)                    | 0.00158468 | 0.00309320 | 0.00228754 | 0.00160807 | 0.00121962 | 0.00095618 |
| OTU_216 (Hyphomicrobium)              | 0.00110238 | 0.00000000 | 0.00000000 | 0.00000000 | 0.00000000 | 0.00000000 |
| OTU_217 (Staphylococcus)              | 0.00006890 | 0.00073260 | 0.00166366 | 0.00014619 | 0.00008712 | 0.00047809 |
| OTU_218 (Sphingomonas)                | 0.00034449 | 0.00170940 | 0.00097047 | 0.00000000 | 0.00052269 | 0.00007968 |
| OTU_219 (Acinetobacter)               | 0.00000000 | 0.00463980 | 0.00103979 | 0.00204663 | 0.00130673 | 0.00127490 |
| OTU_220 (unclassified)                | 0.00000000 | 0.00097680 | 0.00069319 | 0.00007309 | 0.00000000 | 0.00000000 |
| OTU_221 (Bdellovibrio)                | 0.00000000 | 0.00130240 | 0.00090115 | 0.00029238 | 0.00000000 | 0.00015936 |
| OTU_222 (Neisseria)                   | 0.00000000 | 0.00065120 | 0.00041592 | 0.00073094 | 0.00026135 | 0.00039841 |
| OTU_223 (Roseomonas)                  | 0.00137798 | 0.00000000 | 0.00000000 | 0.00000000 | 0.00000000 | 0.00000000 |
| OTU_224 (Mycobacterium)               | 0.00006890 | 0.00008140 | 0.00069319 | 0.00000000 | 0.00043558 | 0.00047809 |
| OTU_225<br>(TM7_genus_incertae_sedis) | 0.00000000 | 0.00016280 | 0.00055455 | 0.00007309 | 0.00000000 | 0.00007968 |
| OTU_226 (Sphingomonas)                | 0.00000000 | 0.00000000 | 0.00000000 | 0.00021928 | 0.00000000 | 0.00063745 |
| OTU_227 (Flavobacterium)              | 0.00000000 | 0.00081400 | 0.00041592 | 0.00000000 | 0.00052269 | 0.00055777 |
| OTU_228 (unclassified)                | 0.00137798 | 0.00000000 | 0.00000000 | 0.00000000 | 0.00000000 | 0.00000000 |
| OTU_229 (Streptococcus)               | 0.00020670 | 0.00024420 | 0.00187162 | 0.00000000 | 0.00017423 | 0.00047809 |
| OTU_230 (unclassified)                | 0.00110238 | 0.00040700 | 0.00020796 | 0.00007309 | 0.00017423 | 0.00015936 |
| OTU_231 (unclassified)                | 0.00000000 | 0.00000000 | 0.00103979 | 0.00007309 | 0.00008712 | 0.00007968 |
| OTU_232 (unclassified)                | 0.00055119 | 0.00032560 | 0.00027728 | 0.00000000 | 0.00000000 | 0.00000000 |
| OTU_233 (GpIIa)                       | 0.00000000 | 0.00097680 | 0.0006932  | 0.00007309 | 0.00000000 | 0.00007968 |
| OTU_234 (Elizabethkingia)             | 0.00000000 | 0.00040700 | 0.00069319 | 0.00021928 | 0.00000000 | 0.00039841 |
| OTU_235 (Legionella)                  | 0.00227367 | 0.00000000 | 0.00000000 | 0.00000000 | 0.00000000 | 0.00000000 |
| OTU_236 (unclassified)                | 0.00000000 | 0.00113960 | 0.00000000 | 0.00000000 | 0.00000000 | 0.00000000 |
| OTU_237 (unclassified)                | 0.00000000 | 0.00056980 | 0.00006932 | 0.00000000 | 0.00008712 | 0.00007968 |
| OTU_238 (Hydrogenophaga)              | 0.00000000 | 0.00382580 | 0.00055455 | 0.00124260 | 0.00148097 | 0.00223108 |
| OTU_239 (unclassified)                | 0.00000000 | 0.00179080 | 0.00027728 | 0.00043856 | 0.00026135 | 0.00031873 |

|                                       |            |            |            |            |            |            |
|---------------------------------------|------------|------------|------------|------------|------------|------------|
| OTU_240<br>(OD1_genus_incertae_sedis) | 0.00000000 | 0.00016280 | 0.00076251 | 0.00007309 | 0.00034846 | 0.00000000 |
| OTU_241 (unclassified)                | 0.00179137 | 0.00000000 | 0.00000000 | 0.00000000 | 0.00008712 | 0.00000000 |
| OTU_242 (unclassified)                | 0.00000000 | 0.00130240 | 0.00090115 | 0.00065785 | 0.00043558 | 0.00047809 |
| OTU_243 (Leifsonia)                   | 0.00075789 | 0.00000000 | 0.00000000 | 0.00000000 | 0.00000000 | 0.00000000 |
| OTU_244 (Erythromicrobium)            | 0.00000000 | 0.00016280 | 0.00076251 | 0.00007309 | 0.00017423 | 0.00039841 |
| OTU_245 (unclassified)                | 0.00075789 | 0.00000000 | 0.00000000 | 0.00000000 | 0.00000000 | 0.00000000 |
| OTU_246 (Enhydrobacter)               | 0.00000000 | 0.00056980 | 0.00270345 | 0.00065785 | 0.00026135 | 0.00111554 |
| OTU_247 (Microbacterium)              | 0.00006890 | 0.00113960 | 0.00069319 | 0.00073094 | 0.00060981 | 0.00055777 |
| OTU_248 (unclassified)                | 0.00020670 | 0.00097680 | 0.00055455 | 0.00043856 | 0.00060981 | 0.00047809 |
| OTU_249 (Gp4)                         | 0.00000000 | 0.00113960 | 0.00076251 | 0.00080403 | 0.00069692 | 0.00087649 |
| OTU_250 (unclassified)                | 0.00006890 | 0.00105820 | 0.00006932 | 0.00029238 | 0.00008712 | 0.00023904 |
| OTU_251 (unclassified)                | 0.00000000 | 0.00000000 | 0.00048523 | 0.00000000 | 0.00000000 | 0.00007968 |
| OTU_252 (unclassified)                | 0.00055119 | 0.00000000 | 0.00000000 | 0.00000000 | 0.00000000 | 0.00000000 |
| OTU_253 (unclassified)                | 0.00000000 | 0.00065120 | 0.00013864 | 0.00029238 | 0.00000000 | 0.00000000 |
| OTU_254 (Methylobacterium)            | 0.00000000 | 0.00056980 | 0.00000000 | 0.00051166 | 0.00008712 | 0.00000000 |
| OTU_255 (Phenylobacterium)            | 0.00000000 | 0.00065120 | 0.00020796 | 0.00051166 | 0.00017423 | 0.00031873 |
| OTU_256 (Eikenella)                   | 0.00000000 | 0.00000000 | 0.00055455 | 0.00000000 | 0.00008712 | 0.00015936 |
| OTU_257 (unclassified)                | 0.00006890 | 0.00048840 | 0.00013864 | 0.00029238 | 0.00000000 | 0.00000000 |
| OTU_258 (unclassified)                | 0.00000000 | 0.00146520 | 0.00041592 | 0.00036547 | 0.00069692 | 0.00031873 |
| OTU_259 (Ilumatobacter)               | 0.00089569 | 0.00000000 | 0.00000000 | 0.00029238 | 0.00000000 | 0.00000000 |
| OTU_260 (unclassified)                | 0.00089569 | 0.00008140 | 0.00006932 | 0.00021928 | 0.00000000 | 0.00000000 |
| OTU_261 (unclassified)                | 0.00000000 | 0.00154660 | 0.00062387 | 0.00029238 | 0.00017423 | 0.00039841 |
| OTU_262<br>(TM7_genus_incertae_sedis) | 0.00000000 | 0.00170940 | 0.00048523 | 0.00000000 | 0.00008712 | 0.00007968 |
| OTU_263 (Sphingomonas)                | 0.00000000 | 0.00000000 | 0.00000000 | 0.00168116 | 0.00139385 | 0.00207171 |
| OTU_264 (Brevibacillus)               | 0.00000000 | 0.00016280 | 0.00048523 | 0.00752869 | 0.00792752 | 0.01378486 |
| OTU_265 (unclassified)                | 0.00000000 | 0.00154660 | 0.00013864 | 0.00124260 | 0.00060981 | 0.00015936 |
| OTU_266 (unclassified)                | 0.00124018 | 0.00000000 | 0.00000000 | 0.00007309 | 0.00000000 | 0.00000000 |
| OTU_267 (unclassified)                | 0.00000000 | 0.00000000 | 0.00041592 | 0.00000000 | 0.00000000 | 0.00000000 |
| OTU_268 (Roseomonas)                  | 0.00144688 | 0.00000000 | 0.00000000 | 0.00000000 | 0.00000000 | 0.00000000 |
| OTU_269 (Marmoricola)                 | 0.00000000 | 0.00008140 | 0.00062387 | 0.00014619 | 0.00000000 | 0.00031873 |
| OTU_270 (unclassified)                | 0.00213587 | 0.00000000 | 0.00000000 | 0.00000000 | 0.00000000 | 0.00000000 |
| OTU_271 (Sphingomonas)                | 0.00000000 | 0.00000000 | 0.00000000 | 0.00029238 | 0.00121962 | 0.00231076 |
| OTU_272 (Lactobacillus)               | 0.00000000 | 0.00000000 | 0.00000000 | 0.04941159 | 0.01472254 | 0.00000000 |
| OTU_273 (unclassified)                | 0.00048229 | 0.00000000 | 0.00000000 | 0.00000000 | 0.00000000 | 0.00000000 |
| OTU_274 (unclassified)                | 0.00013780 | 0.00073260 | 0.00034660 | 0.00014619 | 0.00043558 | 0.00023904 |
| OTU_275 (unclassified)                | 0.00000000 | 0.00081400 | 0.00069319 | 0.00007309 | 0.00000000 | 0.00007968 |
| OTU_276 (unclassified)                | 0.00227367 | 0.00000000 | 0.00000000 | 0.00000000 | 0.00000000 | 0.00000000 |
| OTU_277 (unclassified)                | 0.00006890 | 0.00040700 | 0.00076251 | 0.00029238 | 0.00034846 | 0.00055777 |
| OTU_278<br>(TM7_genus_incertae_sedis) | 0.00000000 | 0.00000000 | 0.00048523 | 0.00000000 | 0.00000000 | 0.00000000 |
| OTU_279 (unclassified)                | 0.00000000 | 0.00073260 | 0.00000000 | 0.00000000 | 0.00008712 | 0.00000000 |
| OTU_280 (unclassified)                | 0.00000000 | 0.00000000 | 0.00152502 | 0.00058475 | 0.00060981 | 0.00023904 |
| OTU_281 (Rheinheimera)                | 0.00006890 | 0.00081400 | 0.00055455 | 0.00007309 | 0.00017423 | 0.00055777 |
| OTU_282 (unclassified)                | 0.00130908 | 0.00000000 | 0.00000000 | 0.00000000 | 0.00000000 | 0.00000000 |
| OTU_283 (unclassified)                | 0.00075789 | 0.00000000 | 0.00000000 | 0.00000000 | 0.00000000 | 0.00000000 |
| OTU_284 (unclassified)                | 0.00000000 | 0.00097680 | 0.00000000 | 0.00087713 | 0.00008712 | 0.00007968 |
| OTU_285 (unclassified)                | 0.00006890 | 0.00130240 | 0.00006932 | 0.00043856 | 0.00043558 | 0.00015936 |
| OTU_286 (unclassified)                | 0.00000000 | 0.00000000 | 0.00110911 | 0.00000000 | 0.00000000 | 0.00023904 |
| OTU_287 (unclassified)                | 0.00000000 | 0.00065120 | 0.00013864 | 0.00000000 | 0.00000000 | 0.00000000 |

|                                                  |            |            |            |            |            |            |
|--------------------------------------------------|------------|------------|------------|------------|------------|------------|
| OTU_288 (unclassified)                           | 0.00000000 | 0.00179080 | 0.00027728 | 0.00080403 | 0.00043558 | 0.00031873 |
| OTU_289<br>(Armatimonas_Armatimonadet<br>es_gp1) | 0.00000000 | 0.00073260 | 0.00055455 | 0.00021928 | 0.00000000 | 0.00031873 |
| OTU_290 (unclassified)                           | 0.00000000 | 0.00000000 | 0.00103979 | 0.00014619 | 0.00008712 | 0.00023904 |
| OTU_291 (unclassified)                           | 0.00000000 | 0.00000000 | 0.00048523 | 0.00000000 | 0.00000000 | 0.00015936 |
| OTU_292<br>(OD1_genus_incertae_sedis)            | 0.00000000 | 0.00081400 | 0.00000000 | 0.00000000 | 0.00000000 | 0.00000000 |
| OTU_293 (Dermacoccus)                            | 0.00020670 | 0.00162800 | 0.00006932 | 0.00021928 | 0.00034846 | 0.00023904 |
| OTU_294 (Brevibacillus)                          | 0.00000000 | 0.00000000 | 0.00006932 | 0.00095022 | 0.00095827 | 0.00358566 |
| OTU_295 (Comamonas)                              | 0.00000000 | 0.00056980 | 0.00027728 | 0.00000000 | 0.00000000 | 0.00000000 |
| OTU_296 (unclassified)                           | 0.00000000 | 0.00211640 | 0.00117843 | 0.00007309 | 0.00069692 | 0.00047809 |
| OTU_297 (Legionella)                             | 0.00013780 | 0.00113960 | 0.00020796 | 0.00021928 | 0.00008712 | 0.00000000 |
| OTU_298 (unclassified)                           | 0.00000000 | 0.00040700 | 0.00000000 | 0.00000000 | 0.00000000 | 0.00000000 |
| OTU_299 (Iamia)                                  | 0.00096459 | 0.00000000 | 0.00000000 | 0.00000000 | 0.00000000 | 0.00000000 |
| OTU_300 (Flectobacillus)                         | 0.00000000 | 0.00073260 | 0.00041592 | 0.00036547 | 0.00000000 | 0.00000000 |
| OTU_301 (unclassified)                           | 0.00055119 | 0.00000000 | 0.00013864 | 0.00000000 | 0.00000000 | 0.00000000 |
| OTU_302 (unclassified)                           | 0.00000000 | 0.00048840 | 0.00000000 | 0.00000000 | 0.00000000 | 0.00000000 |
| OTU_303 (unclassified)                           | 0.00041339 | 0.00000000 | 0.00000000 | 0.00000000 | 0.00000000 | 0.00000000 |
| OTU_304 (Mesorhizobium)                          | 0.00020670 | 0.00138380 | 0.00062387 | 0.00095022 | 0.00078404 | 0.00151394 |
| OTU_305 (unclassified)                           | 0.00000000 | 0.00000000 | 0.00069319 | 0.00051166 | 0.00008712 | 0.00015936 |
| OTU_306 (unclassified)                           | 0.00006890 | 0.00032560 | 0.00069319 | 0.00029238 | 0.00078404 | 0.00095618 |
| OTU_307 (unclassified)                           | 0.00000000 | 0.00056980 | 0.00000000 | 0.00000000 | 0.00000000 | 0.00000000 |
| OTU_308 (unclassified)                           | 0.00000000 | 0.00146520 | 0.00097047 | 0.00014619 | 0.00026135 | 0.00023904 |
| OTU_309 (unclassified)                           | 0.00172247 | 0.00000000 | 0.00000000 | 0.00007309 | 0.00000000 | 0.00000000 |
| OTU_310 (Arthrobacter)                           | 0.00000000 | 0.00187220 | 0.00117843 | 0.00036547 | 0.00000000 | 0.00055777 |
| OTU_311 (unclassified)                           | 0.00000000 | 0.00073260 | 0.00034660 | 0.00043856 | 0.00000000 | 0.00031873 |
| OTU_312 (Lactococcus)                            | 0.00000000 | 0.00000000 | 0.00000000 | 0.00540896 | 0.00845021 | 0.00000000 |
| OTU_313 (Pseudomonas)                            | 0.00006890 | 0.00024420 | 0.00027728 | 0.00000000 | 0.00008712 | 0.00000000 |
| OTU_314 (unclassified)                           | 0.00048229 | 0.00089540 | 0.00006932 | 0.00000000 | 0.00000000 | 0.00000000 |
| OTU_315 (Sphingopyxis)                           | 0.00000000 | 0.00032560 | 0.00034660 | 0.00000000 | 0.00000000 | 0.00031873 |
| OTU_316 (unclassified)                           | 0.00000000 | 0.00040700 | 0.00013864 | 0.00043856 | 0.00008712 | 0.00000000 |
| OTU_317 (Limnohabitans)                          | 0.00013780 | 0.00146520 | 0.00180230 | 0.00051166 | 0.00008712 | 0.00031873 |
| OTU_318 (unclassified)                           | 0.00000000 | 0.00048840 | 0.00000000 | 0.00007309 | 0.00000000 | 0.00000000 |
| OTU_319 (unclassified)                           | 0.00151578 | 0.00000000 | 0.00000000 | 0.00000000 | 0.00000000 | 0.00000000 |
| OTU_320 (unclassified)                           | 0.00151578 | 0.00000000 | 0.00000000 | 0.00000000 | 0.00000000 | 0.00000000 |
| OTU_321 (unclassified)                           | 0.00096459 | 0.00000000 | 0.00000000 | 0.00000000 | 0.00000000 | 0.00000000 |
| OTU_322 (unclassified)                           | 0.00006890 | 0.00048840 | 0.00020796 | 0.00065785 | 0.00034846 | 0.00007968 |
| OTU_323 (unclassified)                           | 0.00213587 | 0.00000000 | 0.00034660 | 0.00007309 | 0.00000000 | 0.00007968 |
| OTU_324 (unclassified)                           | 0.00000000 | 0.00016280 | 0.00055455 | 0.00007309 | 0.00008712 | 0.00007968 |
| OTU_325 (unclassified)                           | 0.00248036 | 0.00000000 | 0.00000000 | 0.00014619 | 0.00000000 | 0.00000000 |
| OTU_326 (Petrobacter)                            | 0.00027560 | 0.00008140 | 0.00041592 | 0.00029238 | 0.00000000 | 0.00023904 |
| OTU_327 (Chitinibacter)                          | 0.00048229 | 0.00008140 | 0.00034660 | 0.00160807 | 0.00261347 | 0.00167331 |
| OTU_328 (unclassified)                           | 0.00000000 | 0.00040700 | 0.00000000 | 0.00000000 | 0.00000000 | 0.00000000 |
| OTU_329 (unclassified)                           | 0.00034449 | 0.00000000 | 0.00000000 | 0.00000000 | 0.00000000 | 0.00000000 |
| OTU_330 (unclassified)                           | 0.00000000 | 0.00105820 | 0.00006932 | 0.00000000 | 0.00026135 | 0.00000000 |
| OTU_331                                          | 0.00006890 | 0.00170940 | 0.00069319 | 0.00073094 | 0.00052269 | 0.00071713 |
| OTU_332 (unclassified)                           | 0.00000000 | 0.00000000 | 0.00034660 | 0.00014619 | 0.00026135 | 0.00000000 |
| OTU_333 (unclassified)                           | 0.00000000 | 0.00048840 | 0.00000000 | 0.00000000 | 0.00000000 | 0.00000000 |
| OTU_334 (unclassified)                           | 0.00000000 | 0.00073260 | 0.00000000 | 0.00043856 | 0.00017423 | 0.00047809 |
| OTU_335 (unclassified)                           | 0.00000000 | 0.00073260 | 0.00020796 | 0.00014619 | 0.00008712 | 0.00000000 |

|                                       |            |            |            |            |            |            |
|---------------------------------------|------------|------------|------------|------------|------------|------------|
| OTU_336 (unclassified)                | 0.00000000 | 0.00000000 | 0.00041592 | 0.00000000 | 0.00000000 | 0.00000000 |
| OTU_337 (Flavobacterium)              | 0.00000000 | 0.00008140 | 0.00034660 | 0.00000000 | 0.00034846 | 0.00007968 |
| OTU_338 (unclassified)                | 0.00034449 | 0.00000000 | 0.00000000 | 0.00000000 | 0.00000000 | 0.00000000 |
| OTU_339 (unclassified)                | 0.00000000 | 0.00000000 | 0.00034660 | 0.00000000 | 0.00017423 | 0.00000000 |
| OTU_340<br>(TM7_genus_incertae_sedis) | 0.00041339 | 0.00000000 | 0.00000000 | 0.00000000 | 0.00000000 | 0.00000000 |
| OTU_341 (unclassified)                | 0.00006890 | 0.00089540 | 0.00041592 | 0.00073094 | 0.00000000 | 0.00031873 |
| OTU_342 (unclassified)                | 0.00000000 | 0.00097680 | 0.00000000 | 0.00029238 | 0.00026135 | 0.00023904 |
| OTU_343 (unclassified)                | 0.00000000 | 0.00000000 | 0.00090115 | 0.00014619 | 0.00000000 | 0.00007968 |
| OTU_344 (unclassified)                | 0.00000000 | 0.00040700 | 0.00020796 | 0.00073094 | 0.00026135 | 0.00015936 |
| OTU_345 (Granulicatella)              | 0.00000000 | 0.00000000 | 0.00076251 | 0.00000000 | 0.00017423 | 0.00000000 |
| OTU_346 (unclassified)                | 0.00000000 | 0.00040700 | 0.00000000 | 0.00000000 | 0.00000000 | 0.00000000 |
| OTU_347 (Aeromonas)                   | 0.00027560 | 0.00000000 | 0.00041592 | 0.00219282 | 0.00531405 | 0.00191235 |
| OTU_348 (unclassified)                | 0.00000000 | 0.00040700 | 0.00000000 | 0.00000000 | 0.00000000 | 0.00000000 |
| OTU_349<br>(TM7_genus_incertae_sedis) | 0.00000000 | 0.00000000 | 0.00076251 | 0.00000000 | 0.00000000 | 0.00007968 |
| OTU_350 (Bdellovibrio)                | 0.00000000 | 0.00024420 | 0.00055455 | 0.00000000 | 0.00008712 | 0.00000000 |
| OTU_351<br>(TM7_genus_incertae_sedis) | 0.00048229 | 0.00000000 | 0.00000000 | 0.00000000 | 0.00000000 | 0.00000000 |
| OTU_352 (unclassified)                | 0.00000000 | 0.00040700 | 0.00000000 | 0.00000000 | 0.00000000 | 0.00000000 |
| OTU_353 (Knoellia)                    | 0.00000000 | 0.00000000 | 0.00062387 | 0.00014619 | 0.00008712 | 0.00000000 |
| OTU_354 (unclassified)                | 0.00000000 | 0.00065120 | 0.00000000 | 0.00065785 | 0.00008712 | 0.00015936 |
| OTU_355 (Chlorophyta)                 | 0.00000000 | 0.00008140 | 0.00062387 | 0.00000000 | 0.00000000 | 0.00000000 |
| OTU_356 (unclassified)                | 0.00000000 | 0.00000000 | 0.00041592 | 0.00000000 | 0.00017423 | 0.00000000 |
| OTU_357                               | 0.00055119 | 0.00000000 | 0.00000000 | 0.00000000 | 0.00000000 | 0.00000000 |
| OTU_358 (Emticicia)                   | 0.00000000 | 0.00016280 | 0.00034660 | 0.00014619 | 0.00000000 | 0.00007968 |
| OTU_359<br>(TM7_genus_incertae_sedis) | 0.00041339 | 0.00000000 | 0.00000000 | 0.00007309 | 0.00000000 | 0.00000000 |
| OTU_360 (unclassified)                | 0.00034449 | 0.00000000 | 0.00000000 | 0.00000000 | 0.00000000 | 0.00000000 |
| OTU_361 (unclassified)                | 0.00027560 | 0.00244200 | 0.00027728 | 0.00073094 | 0.00017423 | 0.00055777 |
| OTU_362<br>(SR1_genus_incertae_sedis) | 0.00006890 | 0.00122100 | 0.00034660 | 0.00080403 | 0.00017423 | 0.00007968 |
| OTU_363 (unclassified)                | 0.00000000 | 0.00056980 | 0.00000000 | 0.00000000 | 0.00000000 | 0.00000000 |
| OTU_364 (unclassified)                | 0.00000000 | 0.00040700 | 0.00062387 | 0.00014619 | 0.00000000 | 0.00000000 |
| OTU_365 (Gp4)                         | 0.00013780 | 0.00040700 | 0.00034660 | 0.00014619 | 0.00000000 | 0.00000000 |
| OTU_366 (unclassified)                | 0.00000000 | 0.00040700 | 0.00000000 | 0.00051166 | 0.00008712 | 0.00007968 |
| OTU_367 (unclassified)                | 0.00000000 | 0.00040700 | 0.00000000 | 0.00000000 | 0.00000000 | 0.00000000 |
| OTU_368 (unclassified)                | 0.00048229 | 0.00000000 | 0.00000000 | 0.00000000 | 0.00000000 | 0.00000000 |
| OTU_369 (Legionella)                  | 0.00000000 | 0.00040700 | 0.00000000 | 0.00000000 | 0.00000000 | 0.00000000 |
| OTU_370 (Sphingomonas)                | 0.00062009 | 0.00008140 | 0.00000000 | 0.00000000 | 0.00008712 | 0.00000000 |
| OTU_371 (unclassified)                | 0.00000000 | 0.00089540 | 0.00069319 | 0.00000000 | 0.00000000 | 0.00015936 |
| OTU_372 (unclassified)                | 0.00000000 | 0.00000000 | 0.00048523 | 0.00029238 | 0.00000000 | 0.00000000 |
| OTU_373 (unclassified)                | 0.00013780 | 0.00000000 | 0.00013864 | 0.00007309 | 0.01306734 | 0.00079681 |
| OTU_374 (unclassified)                | 0.00048229 | 0.00000000 | 0.00000000 | 0.00000000 | 0.00000000 | 0.00000000 |
| OTU_375 (unclassified)                | 0.00006890 | 0.00138380 | 0.00000000 | 0.00000000 | 0.00000000 | 0.00000000 |
| OTU_376 (Streptococcus)               | 0.00000000 | 0.00024420 | 0.00034660 | 0.00000000 | 0.00017423 | 0.00015936 |
| OTU_377 (Pedobacter)                  | 0.00000000 | 0.00056980 | 0.00000000 | 0.00014619 | 0.00000000 | 0.00000000 |
| OTU_378 (Ilumatobacter)               | 0.00000000 | 0.00032560 | 0.00000000 | 0.00000000 | 0.00000000 | 0.00000000 |
| OTU_379 (unclassified)                | 0.00000000 | 0.00032560 | 0.00000000 | 0.00000000 | 0.00000000 | 0.00000000 |
| OTU_380 (unclassified)                | 0.00000000 | 0.00187220 | 0.00020796 | 0.00021928 | 0.00000000 | 0.00015936 |



|                                                  |            |            |            |            |            |            |
|--------------------------------------------------|------------|------------|------------|------------|------------|------------|
| OTU_381<br>(OD1_genus_incertae_sedis)            | 0.00000000 | 0.00056980 | 0.00000000 | 0.00000000 | 0.00000000 | 0.00000000 |
| OTU_382 (unclassified)                           | 0.00000000 | 0.00073260 | 0.00027728 | 0.00065785 | 0.00043558 | 0.00063745 |
| OTU_383 (Leadbetterella)                         | 0.00000000 | 0.00000000 | 0.00048523 | 0.00000000 | 0.00017423 | 0.00007968 |
| OTU_384 (unclassified)                           | 0.00000000 | 0.00081400 | 0.00000000 | 0.00000000 | 0.00000000 | 0.00000000 |
| OTU_385<br>(Clostridium_sensu_stricto)           | 0.00000000 | 0.00000000 | 0.00000000 | 0.00877129 | 0.00113250 | 0.00000000 |
| OTU_386 (unclassified)                           | 0.00000000 | 0.00008140 | 0.00048523 | 0.00000000 | 0.00017423 | 0.00007968 |
| OTU_387 (unclassified)                           | 0.00000000 | 0.00032560 | 0.00000000 | 0.00000000 | 0.00000000 | 0.00000000 |
| OTU_388 (Bacillariophyta)                        | 0.00000000 | 0.00056980 | 0.00020796 | 0.00014619 | 0.00000000 | 0.00000000 |
| OTU_389 (unclassified)                           | 0.00000000 | 0.00000000 | 0.00000000 | 0.00000000 | 0.00008712 | 0.00039841 |
| OTU_390<br>(TM7_genus_incertae_sedis)            | 0.00000000 | 0.00089540 | 0.00000000 | 0.00000000 | 0.00000000 | 0.00000000 |
| OTU_391 (Ilumatobacter)                          | 0.00337605 | 0.00000000 | 0.00000000 | 0.00000000 | 0.00000000 | 0.00000000 |
| OTU_392 (unclassified)                           | 0.00096459 | 0.00048840 | 0.00048523 | 0.00000000 | 0.00008712 | 0.00000000 |
| OTU_393 (unclassified)                           | 0.00000000 | 0.00122100 | 0.00027728 | 0.00000000 | 0.00000000 | 0.00007968 |
| OTU_394<br>(TM7_genus_incertae_sedis)            | 0.00000000 | 0.00065120 | 0.00076251 | 0.00021928 | 0.00000000 | 0.00023904 |
| OTU_395 (unclassified)                           | 0.00000000 | 0.00073260 | 0.00124775 | 0.00000000 | 0.00000000 | 0.00015936 |
| OTU_396 (unclassified)                           | 0.00000000 | 0.00016280 | 0.00069319 | 0.00029238 | 0.00034846 | 0.00000000 |
| OTU_397 (unclassified)                           | 0.00000000 | 0.00008140 | 0.00027728 | 0.00058475 | 0.00000000 | 0.00015936 |
| OTU_398 (unclassified)                           | 0.00000000 | 0.00073260 | 0.00000000 | 0.00000000 | 0.00017423 | 0.00000000 |
| OTU_399 (unclassified)                           | 0.00034449 | 0.00000000 | 0.00000000 | 0.00000000 | 0.00000000 | 0.00000000 |
| OTU_400 (unclassified)                           | 0.00000000 | 0.00040700 | 0.00041592 | 0.00073094 | 0.00017423 | 0.00023904 |
| OTU_401 (unclassified)                           | 0.00000000 | 0.00056980 | 0.00000000 | 0.00000000 | 0.00000000 | 0.00000000 |
| OTU_402 (Rubrobacter)                            | 0.00006890 | 0.00024420 | 0.00055455 | 0.00014619 | 0.00008712 | 0.00023904 |
| OTU_403 (unclassified)                           | 0.00068899 | 0.00000000 | 0.00000000 | 0.00000000 | 0.00000000 | 0.00000000 |
| OTU_404 (Streptococcus)                          | 0.00000000 | 0.00040700 | 0.00110911 | 0.00043856 | 0.00060981 | 0.00015936 |
| OTU_405 (unclassified)                           | 0.00000000 | 0.00000000 | 0.00034660 | 0.00029238 | 0.00017423 | 0.00063745 |
| OTU_406 (unclassified)                           | 0.00124018 | 0.00000000 | 0.00000000 | 0.00000000 | 0.00000000 | 0.00000000 |
| OTU_407<br>(TM7_genus_incertae_sedis)            | 0.00048229 | 0.00040700 | 0.00034660 | 0.00021928 | 0.00000000 | 0.00007968 |
| OTU_408 (unclassified)                           | 0.00110238 | 0.00000000 | 0.00000000 | 0.00000000 | 0.00026135 | 0.00000000 |
| OTU_409 (Aquicella)                              | 0.00000000 | 0.00016280 | 0.00062387 | 0.00000000 | 0.00000000 | 0.00000000 |
| OTU_410 (unclassified)                           | 0.00000000 | 0.00000000 | 0.00027728 | 0.00000000 | 0.00000000 | 0.00000000 |
| OTU_411<br>(TM7_genus_incertae_sedis)            | 0.00000000 | 0.00040700 | 0.00110911 | 0.00007309 | 0.00008712 | 0.00023904 |
| OTU_412 (unclassified)                           | 0.00062009 | 0.00000000 | 0.00000000 | 0.00000000 | 0.00000000 | 0.00000000 |
| OTU_413 (unclassified)                           | 0.00000000 | 0.00000000 | 0.00110911 | 0.00299686 | 0.00121962 | 0.00509960 |
| OTU_414 (unclassified)                           | 0.00000000 | 0.00081400 | 0.00000000 | 0.00000000 | 0.00000000 | 0.00000000 |
| OTU_415 (unclassified)                           | 0.00000000 | 0.00008140 | 0.00020796 | 0.00007309 | 0.00000000 | 0.00000000 |
| OTU_416<br>(Armatimonas_Armatimonadet<br>es_gp1) | 0.00000000 | 0.00040700 | 0.00013864 | 0.00000000 | 0.00000000 | 0.00047809 |
| OTU_417 (unclassified)                           | 0.00000000 | 0.00016280 | 0.00041592 | 0.00000000 | 0.00000000 | 0.00007968 |
| OTU_418<br>(Clostridium_sensu_stricto)           | 0.00000000 | 0.00138380 | 0.00000000 | 0.00000000 | 0.00008712 | 0.00000000 |
| OTU_419 (unclassified)                           | 0.00006890 | 0.00008140 | 0.00041592 | 0.00007309 | 0.00000000 | 0.00000000 |
| OTU_420 (unclassified)                           | 0.00000000 | 0.00056980 | 0.00000000 | 0.00000000 | 0.00000000 | 0.00000000 |
| OTU_421 (Fluviicola)                             | 0.00000000 | 0.00130240 | 0.00083183 | 0.00007309 | 0.00060981 | 0.00015936 |
| OTU_422 (unclassified)                           | 0.00000000 | 0.00000000 | 0.00027728 | 0.00021928 | 0.00000000 | 0.00000000 |

|                                       |            |            |            |            |            |            |
|---------------------------------------|------------|------------|------------|------------|------------|------------|
| OTU_423 (unclassified)                | 0.00000000 | 0.00056980 | 0.00027728 | 0.00021928 | 0.00000000 | 0.00007968 |
| OTU_424 (unclassified)                | 0.00000000 | 0.00056980 | 0.00000000 | 0.00000000 | 0.00000000 | 0.00000000 |
| OTU_425 (unclassified)                | 0.00000000 | 0.00048840 | 0.00000000 | 0.00000000 | 0.00017423 | 0.00015936 |
| OTU_426 (Janibacter)                  | 0.00000000 | 0.00056980 | 0.00076251 | 0.00073094 | 0.00008712 | 0.00119522 |
| OTU_427 (unclassified)                | 0.00068899 | 0.00000000 | 0.00000000 | 0.00036547 | 0.00000000 | 0.00000000 |
| OTU_428 (unclassified)                | 0.00000000 | 0.00073260 | 0.00006932 | 0.00000000 | 0.00008712 | 0.00023904 |
| OTU_429 (Kingella)                    | 0.00013780 | 0.00000000 | 0.00062387 | 0.00014619 | 0.00017423 | 0.00023904 |
| OTU_430 (Aquicella)                   | 0.00034449 | 0.00000000 | 0.00000000 | 0.00000000 | 0.00000000 | 0.00000000 |
| OTU_431 (Aeromonas)                   | 0.00006890 | 0.00000000 | 0.00291141 | 0.00438564 | 0.00531405 | 0.00183267 |
| OTU_432 (unclassified)                | 0.00000000 | 0.00056980 | 0.00013864 | 0.00058475 | 0.00008712 | 0.00047809 |
| OTU_433 (unclassified)                | 0.00000000 | 0.00154660 | 0.00000000 | 0.00029238 | 0.00017423 | 0.00023904 |
| OTU_434 (unclassified)                | 0.00000000 | 0.00000000 | 0.00048523 | 0.00000000 | 0.00000000 | 0.00031873 |
| OTU_435 (unclassified)                | 0.00000000 | 0.00000000 | 0.00027728 | 0.00029238 | 0.00000000 | 0.00007968 |
| OTU_436 (Mucilaginibacter)            | 0.00000000 | 0.00032560 | 0.00034660 | 0.00036547 | 0.00000000 | 0.00000000 |
| OTU_437 (unclassified)                | 0.00000000 | 0.00000000 | 0.00034660 | 0.00000000 | 0.00000000 | 0.00000000 |
| OTU_438 (unclassified)                | 0.00000000 | 0.00081400 | 0.00041592 | 0.00000000 | 0.00000000 | 0.00007968 |
| OTU_439 (unclassified)                | 0.00000000 | 0.00000000 | 0.00020796 | 0.00000000 | 0.00000000 | 0.00000000 |
| OTU_440 (unclassified)                | 0.00000000 | 0.00081400 | 0.00027728 | 0.00029238 | 0.00000000 | 0.00000000 |
| OTU_441 (unclassified)                | 0.00000000 | 0.00000000 | 0.00041592 | 0.00000000 | 0.00000000 | 0.00000000 |
| OTU_442<br>(TM7_genus_incertae_sedis) | 0.00000000 | 0.00105820 | 0.00000000 | 0.00007309 | 0.00008712 | 0.00000000 |
| OTU_443 (unclassified)                | 0.00000000 | 0.00089540 | 0.00000000 | 0.00014619 | 0.00000000 | 0.00015936 |
| OTU_444 (unclassified)                | 0.00000000 | 0.00032560 | 0.00000000 | 0.00000000 | 0.00000000 | 0.00000000 |
| OTU_445 (Flavobacterium)              | 0.00000000 | 0.00073260 | 0.00000000 | 0.00000000 | 0.00000000 | 0.00000000 |
| OTU_446 (unclassified)                | 0.00000000 | 0.00024420 | 0.00000000 | 0.00000000 | 0.00000000 | 0.00000000 |
| OTU_447 (unclassified)                | 0.00000000 | 0.00073260 | 0.00000000 | 0.00051166 | 0.00000000 | 0.00000000 |
| OTU_448 (unclassified)                | 0.00000000 | 0.00032560 | 0.00000000 | 0.00000000 | 0.00000000 | 0.00000000 |
| OTU_449 (unclassified)                | 0.00089569 | 0.00000000 | 0.00000000 | 0.00000000 | 0.00000000 | 0.00000000 |
| OTU_450 (unclassified)                | 0.00000000 | 0.00040700 | 0.00000000 | 0.00000000 | 0.00000000 | 0.00000000 |
| OTU_451 (unclassified)                | 0.00089569 | 0.00000000 | 0.00000000 | 0.00000000 | 0.00000000 | 0.00000000 |
| OTU_452 (Methylotenera)               | 0.00000000 | 0.00016280 | 0.00034660 | 0.00000000 | 0.00000000 | 0.00007968 |
| OTU_453 (unclassified)                | 0.00000000 | 0.00024420 | 0.00006932 | 0.00014619 | 0.00017423 | 0.00000000 |
| OTU_454 (unclassified)                | 0.00000000 | 0.00048840 | 0.00000000 | 0.00000000 | 0.00000000 | 0.00000000 |
| OTU_455 (Legionella)                  | 0.00000000 | 0.00048840 | 0.00069319 | 0.00000000 | 0.00000000 | 0.00000000 |
| OTU_456 (unclassified)                | 0.00096459 | 0.00000000 | 0.00000000 | 0.00000000 | 0.00000000 | 0.00000000 |
| OTU_457 (unclassified)                | 0.00000000 | 0.00048840 | 0.00034660 | 0.00043856 | 0.00008712 | 0.00000000 |
| OTU_458 (unclassified)                | 0.00000000 | 0.00024420 | 0.00000000 | 0.00000000 | 0.00000000 | 0.00000000 |
| OTU_459 (unclassified)                | 0.00000000 | 0.00056980 | 0.00000000 | 0.00021928 | 0.00008712 | 0.00000000 |
| OTU_460 (unclassified)                | 0.00000000 | 0.00040700 | 0.00020796 | 0.00000000 | 0.00000000 | 0.00000000 |
| OTU_461 (unclassified)                | 0.00000000 | 0.00008140 | 0.00000000 | 0.00036547 | 0.00000000 | 0.00000000 |
| OTU_462 (unclassified)                | 0.00000000 | 0.00040700 | 0.00000000 | 0.00000000 | 0.00000000 | 0.00000000 |
| OTU_463 (unclassified)                | 0.00000000 | 0.00138380 | 0.00000000 | 0.00000000 | 0.00008712 | 0.00000000 |
| OTU_464 (unclassified)                | 0.00000000 | 0.00000000 | 0.00020796 | 0.00000000 | 0.00000000 | 0.00000000 |
| OTU_465 (unclassified)                | 0.00027560 | 0.00000000 | 0.00000000 | 0.00000000 | 0.00000000 | 0.00000000 |
| OTU_466 (Flavobacterium)              | 0.00000000 | 0.00024420 | 0.00034660 | 0.00000000 | 0.00008712 | 0.00007968 |
| OTU_467 (Methylobacterium)            | 0.00006890 | 0.00032560 | 0.00000000 | 0.00000000 | 0.00000000 | 0.00000000 |
| OTU_468 (Brachybacterium)             | 0.00000000 | 0.00000000 | 0.00041592 | 0.00065785 | 0.00000000 | 0.00007968 |
| OTU_469 (Gordonia)                    | 0.00000000 | 0.00000000 | 0.00055455 | 0.00029238 | 0.00008712 | 0.00023904 |
| OTU_470 (unclassified)                | 0.00034449 | 0.00000000 | 0.00000000 | 0.00000000 | 0.00000000 | 0.00000000 |
| OTU_471 (unclassified)                | 0.00000000 | 0.00073260 | 0.00000000 | 0.00007309 | 0.00069692 | 0.00007968 |
| OTU_472 (Flavobacterium)              | 0.00000000 | 0.00000000 | 0.00027728 | 0.00000000 | 0.00000000 | 0.00000000 |

|                                       |            |            |            |            |            |            |
|---------------------------------------|------------|------------|------------|------------|------------|------------|
| OTU_473 (unclassified)                | 0.00082679 | 0.00000000 | 0.00000000 | 0.00000000 | 0.00000000 | 0.00000000 |
| OTU_474 (unclassified)                | 0.00000000 | 0.00056980 | 0.00000000 | 0.00000000 | 0.00000000 | 0.00000000 |
| OTU_475 (Sphingopyxis)                | 0.00000000 | 0.00032560 | 0.00076251 | 0.00000000 | 0.00008712 | 0.00055777 |
| OTU_476 (unclassified)                | 0.00041339 | 0.00000000 | 0.00000000 | 0.00000000 | 0.00000000 | 0.00000000 |
| OTU_477 (Micrococcus)                 | 0.00020670 | 0.00032560 | 0.00000000 | 0.00000000 | 0.00000000 | 0.00000000 |
| OTU_478 (Streptomyces)                | 0.00000000 | 0.00000000 | 0.00034660 | 0.00014619 | 0.00095827 | 0.00023904 |
| OTU_479 (unclassified)                | 0.00020670 | 0.00000000 | 0.00000000 | 0.00000000 | 0.00000000 | 0.00000000 |
| OTU_480 (Legionella)                  | 0.00041339 | 0.00000000 | 0.00000000 | 0.00000000 | 0.00000000 | 0.00000000 |
| OTU_481 (unclassified)                | 0.00000000 | 0.00040700 | 0.00000000 | 0.00000000 | 0.00000000 | 0.00000000 |
| OTU_482 (Schlegelella)                | 0.00000000 | 0.00040700 | 0.00000000 | 0.00000000 | 0.00000000 | 0.00015936 |
| OTU_483 (unclassified)                | 0.00000000 | 0.00000000 | 0.00041592 | 0.00000000 | 0.00000000 | 0.00039841 |
| OTU_484 (Tetrasphaera)                | 0.00000000 | 0.00000000 | 0.00034660 | 0.00014619 | 0.00000000 | 0.00000000 |
| OTU_485 (unclassified)                | 0.00372055 | 0.00000000 | 0.00000000 | 0.00021928 | 0.00008712 | 0.00015936 |
| OTU_486 (unclassified)                | 0.00000000 | 0.00032560 | 0.00000000 | 0.00014619 | 0.00000000 | 0.00000000 |
| OTU_487 (Flavobacterium)              | 0.00000000 | 0.00008140 | 0.00048523 | 0.00007309 | 0.00008712 | 0.00031873 |
| OTU_488<br>(OD1_genus_incertae_sedis) | 0.00006890 | 0.00195360 | 0.00110911 | 0.00000000 | 0.00026135 | 0.00007968 |
| OTU_489 (unclassified)                | 0.00000000 | 0.00040700 | 0.00000000 | 0.00029238 | 0.00008712 | 0.00007968 |
| OTU_490 (unclassified)                | 0.00027560 | 0.00000000 | 0.00000000 | 0.00000000 | 0.00000000 | 0.00000000 |
| OTU_491<br>(OD1_genus_incertae_sedis) | 0.00000000 | 0.00024420 | 0.00000000 | 0.00000000 | 0.00000000 | 0.00000000 |
| OTU_492 (unclassified)                | 0.00068899 | 0.00016280 | 0.00000000 | 0.00000000 | 0.00000000 | 0.00000000 |
| OTU_493 (Legionella)                  | 0.00041339 | 0.00000000 | 0.00000000 | 0.00000000 | 0.00000000 | 0.00000000 |
| OTU_494 (Paenibacillus)               | 0.00000000 | 0.00000000 | 0.00000000 | 0.00124260 | 0.00174231 | 0.00326693 |
| OTU_495 (unclassified)                | 0.00000000 | 0.00000000 | 0.00055455 | 0.00000000 | 0.00000000 | 0.00007968 |
| OTU_496 (unclassified)                | 0.00000000 | 0.00000000 | 0.00020796 | 0.00000000 | 0.00000000 | 0.00000000 |
| OTU_497 (unclassified)                | 0.00000000 | 0.00154660 | 0.00041592 | 0.00219282 | 0.00156808 | 0.00087649 |
| OTU_498 (unclassified)                | 0.00027560 | 0.00000000 | 0.00000000 | 0.00000000 | 0.00000000 | 0.00000000 |
| OTU_499 (unclassified)                | 0.00000000 | 0.00008140 | 0.00027728 | 0.00021928 | 0.00008712 | 0.00023904 |
| OTU_500 (Geobacillus)                 | 0.00000000 | 0.00000000 | 0.00000000 | 0.00233901 | 0.00139385 | 0.00302789 |
| OTU_501 (Corynebacterium)             | 0.00000000 | 0.00000000 | 0.00020796 | 0.00000000 | 0.00000000 | 0.00007968 |
| OTU_502 (unclassified)                | 0.00000000 | 0.00056980 | 0.00000000 | 0.00000000 | 0.00000000 | 0.00000000 |
| OTU_503 (unclassified)                | 0.00000000 | 0.00040700 | 0.00034660 | 0.00138879 | 0.00078404 | 0.00015936 |
| OTU_504 (Nocardioides)                | 0.00096459 | 0.00048840 | 0.00048523 | 0.00000000 | 0.00008712 | 0.00031873 |
| OTU_505<br>(TM7_genus_incertae_sedis) | 0.00041339 | 0.00008140 | 0.00000000 | 0.00000000 | 0.00000000 | 0.00007968 |
| OTU_506 (Rhodococcus)                 | 0.00020670 | 0.00000000 | 0.00000000 | 0.00000000 | 0.00000000 | 0.00000000 |
| OTU_507 (unclassified)                | 0.00020670 | 0.00000000 | 0.00000000 | 0.00000000 | 0.00000000 | 0.00000000 |
| OTU_508 (Patulibacter)                | 0.00000000 | 0.00000000 | 0.00027728 | 0.00000000 | 0.00008712 | 0.00047809 |
| OTU_509 (unclassified)                | 0.00000000 | 0.00000000 | 0.00055455 | 0.00000000 | 0.00008712 | 0.00063745 |
| OTU_510 (Chlorophyta)                 | 0.00000000 | 0.00040700 | 0.00090115 | 0.00000000 | 0.00008712 | 0.00023904 |
| OTU_511 (unclassified)                | 0.00000000 | 0.00040700 | 0.00000000 | 0.00000000 | 0.00000000 | 0.00000000 |
| OTU_512 (unclassified)                | 0.00000000 | 0.00000000 | 0.00013864 | 0.00000000 | 0.00008712 | 0.00007968 |
| OTU_513<br>(TM7_genus_incertae_sedis) | 0.00013780 | 0.00056980 | 0.00000000 | 0.00000000 | 0.00000000 | 0.00000000 |
| OTU_514 (Gpl)                         | 0.00000000 | 0.00073260 | 0.00006932 | 0.00051166 | 0.00026135 | 0.00000000 |
| OTU_515 (unclassified)                | 0.00000000 | 0.00073260 | 0.00069319 | 0.00080403 | 0.00008712 | 0.00039841 |
| OTU_516 (Phenylobacterium)            | 0.00000000 | 0.00000000 | 0.00000000 | 0.00036547 | 0.00017423 | 0.00000000 |
| OTU_517 (unclassified)                | 0.00020670 | 0.00154660 | 0.00090115 | 0.00021928 | 0.00000000 | 0.00031873 |
| OTU_518 (Gemmatimonas)                | 0.00000000 | 0.00032560 | 0.00020796 | 0.00000000 | 0.00000000 | 0.00007968 |
| OTU_519 (unclassified)                | 0.00034449 | 0.00000000 | 0.00000000 | 0.00000000 | 0.00000000 | 0.00000000 |

|                                       |            |            |            |            |            |            |
|---------------------------------------|------------|------------|------------|------------|------------|------------|
| OTU_520 (Nesterenkonia)               | 0.00000000 | 0.00000000 | 0.00048523 | 0.00014619 | 0.00000000 | 0.00015936 |
| OTU_521 (Brevundimonas)               | 0.00062009 | 0.00000000 | 0.00000000 | 0.00014619 | 0.00008712 | 0.00000000 |
| OTU_522 (Gp4)                         | 0.00000000 | 0.00056980 | 0.00013864 | 0.00014619 | 0.00017423 | 0.00000000 |
| OTU_523 (unclassified)                | 0.00075789 | 0.00000000 | 0.00000000 | 0.00007309 | 0.00000000 | 0.00000000 |
| OTU_524 (unclassified)                | 0.00000000 | 0.00024420 | 0.00000000 | 0.00000000 | 0.00000000 | 0.00000000 |
| OTU_525 (unclassified)                | 0.00000000 | 0.00032560 | 0.00034660 | 0.00065785 | 0.00000000 | 0.00039841 |
| OTU_526 (unclassified)                | 0.00000000 | 0.00073260 | 0.00000000 | 0.00000000 | 0.00000000 | 0.00000000 |
| OTU_527 (unclassified)                | 0.00000000 | 0.00000000 | 0.00000000 | 0.00000000 | 0.00008712 | 0.00023904 |
| OTU_528 (unclassified)                | 0.00020670 | 0.00032560 | 0.00027728 | 0.00073094 | 0.00043558 | 0.00055777 |
| OTU_529 (unclassified)                | 0.00000000 | 0.00000000 | 0.00020796 | 0.00000000 | 0.00000000 | 0.00000000 |
| OTU_530 (Carnobacterium)              | 0.00055119 | 0.00000000 | 0.00000000 | 0.00007309 | 0.00000000 | 0.00000000 |
| OTU_531 (Variovorax)                  | 0.00000000 | 0.00244200 | 0.00069319 | 0.00051166 | 0.00078404 | 0.00071713 |
| OTU_532 (Aquicella)                   | 0.00000000 | 0.00024420 | 0.00000000 | 0.00000000 | 0.00000000 | 0.00000000 |
| OTU_533 (Chlorophyta)                 | 0.00000000 | 0.00056980 | 0.00020796 | 0.00000000 | 0.00000000 | 0.00007968 |
| OTU_534 (unclassified)                | 0.00034449 | 0.00000000 | 0.00000000 | 0.00000000 | 0.00000000 | 0.00000000 |
| OTU_535 (Gp16)                        | 0.00027560 | 0.00000000 | 0.00000000 | 0.00014619 | 0.00000000 | 0.00000000 |
| OTU_536 (unclassified)                | 0.00055119 | 0.00000000 | 0.00006932 | 0.00000000 | 0.00000000 | 0.00000000 |
| OTU_537<br>(TM7_genus_incertae_sedis) | 0.00027560 | 0.00000000 | 0.00000000 | 0.00000000 | 0.00000000 | 0.00000000 |
| OTU_538 (Streptophyta)                | 0.00682100 | 0.00032560 | 0.00000000 | 0.00058475 | 0.00026135 | 0.00031873 |
| OTU_539 (unclassified)                | 0.00000000 | 0.00089540 | 0.00000000 | 0.00000000 | 0.00000000 | 0.00000000 |
| OTU_540 (unclassified)                | 0.00048229 | 0.00000000 | 0.00000000 | 0.00000000 | 0.00000000 | 0.00000000 |
| OTU_541 (unclassified)                | 0.00034449 | 0.00000000 | 0.00000000 | 0.00000000 | 0.00000000 | 0.00000000 |
| OTU_542 (Brachybacterium)             | 0.00013780 | 0.00000000 | 0.00110911 | 0.00000000 | 0.00000000 | 0.00047809 |
| OTU_543 (unclassified)                | 0.00000000 | 0.00024420 | 0.00000000 | 0.00000000 | 0.00000000 | 0.00000000 |
| OTU_544 (unclassified)                | 0.00220477 | 0.00000000 | 0.00000000 | 0.00000000 | 0.00000000 | 0.00000000 |
| OTU_545 (unclassified)                | 0.00000000 | 0.00056980 | 0.00041592 | 0.00014619 | 0.00026135 | 0.00047809 |
| OTU_546 (unclassified)                | 0.00062009 | 0.00000000 | 0.00000000 | 0.00000000 | 0.00000000 | 0.00000000 |
| OTU_547 (unclassified)                | 0.00000000 | 0.00016280 | 0.00000000 | 0.00014619 | 0.00034846 | 0.00015936 |
| OTU_548 (Calditerricola)              | 0.00020670 | 0.00089540 | 0.00062387 | 0.00000000 | 0.00026135 | 0.00063745 |
| OTU_549 (Ralstonia)                   | 0.00000000 | 0.00000000 | 0.00055455 | 0.00043856 | 0.00000000 | 0.00000000 |
| OTU_550 (unclassified)                | 0.00000000 | 0.00000000 | 0.00000000 | 0.00051166 | 0.00078404 | 0.00071713 |
| OTU_551 (Corynebacterium)             | 0.00000000 | 0.00040700 | 0.00076251 | 0.00065785 | 0.00060981 | 0.00111554 |
| OTU_552 (Paracoccus)                  | 0.00013780 | 0.00016280 | 0.00000000 | 0.00000000 | 0.00000000 | 0.00000000 |
| OTU_553 (unclassified)                | 0.00075789 | 0.00000000 | 0.00000000 | 0.00000000 | 0.00008712 | 0.00000000 |
| OTU_554 (Sphaerotilus)                | 0.00000000 | 0.00073260 | 0.00000000 | 0.00000000 | 0.00000000 | 0.00007968 |
| OTU_555 (unclassified)                | 0.00000000 | 0.00032560 | 0.00006932 | 0.00000000 | 0.00026135 | 0.00000000 |
| OTU_556 (unclassified)                | 0.00000000 | 0.00048840 | 0.00000000 | 0.00000000 | 0.00000000 | 0.00000000 |
| OTU_557 (unclassified)                | 0.00000000 | 0.00024420 | 0.00000000 | 0.00000000 | 0.00000000 | 0.00000000 |
| OTU_558 (unclassified)                | 0.00000000 | 0.00000000 | 0.00027728 | 0.00000000 | 0.00000000 | 0.00007968 |
| OTU_559 (unclassified)                | 0.00000000 | 0.00000000 | 0.00041592 | 0.00014619 | 0.00034846 | 0.00031873 |
| OTU_560 (unclassified)                | 0.00000000 | 0.00032560 | 0.00027728 | 0.00000000 | 0.00008712 | 0.00031873 |
| OTU_561 (Haliscomenobacter)           | 0.00000000 | 0.00073260 | 0.00013864 | 0.00000000 | 0.00008712 | 0.00023904 |
| OTU_562 (unclassified)                | 0.00075789 | 0.00000000 | 0.00000000 | 0.00000000 | 0.00000000 | 0.00000000 |
| OTU_563 (unclassified)                | 0.00000000 | 0.00040700 | 0.00000000 | 0.00000000 | 0.00000000 | 0.00000000 |
| OTU_564 (Geothrix)                    | 0.00000000 | 0.00065120 | 0.00000000 | 0.00000000 | 0.00000000 | 0.00000000 |
| OTU_565 (unclassified)                | 0.00034449 | 0.00000000 | 0.00000000 | 0.00000000 | 0.00000000 | 0.00000000 |
| OTU_566 (unclassified)                | 0.00000000 | 0.00000000 | 0.00027728 | 0.00000000 | 0.00000000 | 0.00000000 |
| OTU_567 (unclassified)                | 0.00020670 | 0.00000000 | 0.00000000 | 0.00000000 | 0.00000000 | 0.00000000 |
| OTU_568 (Aquicella)                   | 0.00020670 | 0.00000000 | 0.00000000 | 0.00000000 | 0.00000000 | 0.00000000 |
| OTU_569 (Meiothermus)                 | 0.00034449 | 0.00000000 | 0.00000000 | 0.00000000 | 0.00000000 | 0.00000000 |

|                                       |            |            |            |            |            |            |
|---------------------------------------|------------|------------|------------|------------|------------|------------|
| OTU_570<br>(OD1_genus_incertae_sedis) | 0.00000000 | 0.00089540 | 0.00000000 | 0.00000000 | 0.00000000 | 0.00000000 |
| OTU_571 (Dermacoccus)                 | 0.00000000 | 0.00048840 | 0.00000000 | 0.00007309 | 0.00000000 | 0.00000000 |
| OTU_572 (unclassified)                | 0.00000000 | 0.00008140 | 0.00034660 | 0.00000000 | 0.00000000 | 0.00015936 |
| OTU_573<br>(TM7_genus_incertae_sedis) | 0.00048229 | 0.00000000 | 0.00000000 | 0.00007309 | 0.00000000 | 0.00000000 |
| OTU_574 (unclassified)                | 0.00075789 | 0.00000000 | 0.00000000 | 0.00000000 | 0.00000000 | 0.00000000 |
| OTU_575 (unclassified)                | 0.00000000 | 0.00048840 | 0.00027728 | 0.00007309 | 0.00026135 | 0.00063745 |
| OTU_576 (unclassified)                | 0.00000000 | 0.00040700 | 0.00000000 | 0.00000000 | 0.00000000 | 0.00000000 |
| OTU_577 (Iamia)                       | 0.00000000 | 0.00024420 | 0.00000000 | 0.00007309 | 0.00000000 | 0.00000000 |
| OTU_578 (Singulisphaera)              | 0.00000000 | 0.00000000 | 0.00000000 | 0.00080403 | 0.00000000 | 0.00000000 |
| OTU_579<br>(OD1_genus_incertae_sedis) | 0.00000000 | 0.00073260 | 0.00000000 | 0.00000000 | 0.00000000 | 0.00000000 |
| OTU_580 (unclassified)                | 0.00000000 | 0.00048840 | 0.00041592 | 0.00000000 | 0.00000000 | 0.00000000 |
| OTU_581<br>(TM7_genus_incertae_sedis) | 0.00000000 | 0.00032560 | 0.00000000 | 0.00000000 | 0.00000000 | 0.00000000 |
| OTU_582<br>(TM7_genus_incertae_sedis) | 0.00000000 | 0.00008140 | 0.00048523 | 0.00014619 | 0.00000000 | 0.00000000 |
| OTU_583 (unclassified)                | 0.00000000 | 0.00024420 | 0.00000000 | 0.00124260 | 0.00052269 | 0.00039841 |
| OTU_584 (Haliscomenobacter)           | 0.00000000 | 0.00081400 | 0.00000000 | 0.00021928 | 0.00000000 | 0.00000000 |
| OTU_585 (unclassified)                | 0.00000000 | 0.00056980 | 0.00020796 | 0.00000000 | 0.00026135 | 0.00071713 |
| OTU_586 (unclassified)                | 0.00000000 | 0.00000000 | 0.00076251 | 0.00029238 | 0.00017423 | 0.00007968 |
| OTU_587 (unclassified)                | 0.00000000 | 0.00032560 | 0.00000000 | 0.00000000 | 0.00000000 | 0.00000000 |
| OTU_588 (unclassified)                | 0.00000000 | 0.00048840 | 0.00000000 | 0.00000000 | 0.00000000 | 0.00000000 |
| OTU_589 (Bdellovibrio)                | 0.00000000 | 0.00024420 | 0.00020796 | 0.00000000 | 0.00000000 | 0.00000000 |
| OTU_590 (unclassified)                | 0.00000000 | 0.00032560 | 0.00000000 | 0.00000000 | 0.00000000 | 0.00000000 |
| OTU_591 (unclassified)                | 0.00000000 | 0.00040700 | 0.00020796 | 0.00000000 | 0.00000000 | 0.00007968 |
| OTU_592 (unclassified)                | 0.00000000 | 0.00032560 | 0.00000000 | 0.00000000 | 0.00000000 | 0.00000000 |
| OTU_593 (unclassified)                | 0.00034449 | 0.00000000 | 0.00000000 | 0.00000000 | 0.00000000 | 0.00000000 |
| OTU_594 (unclassified)                | 0.00000000 | 0.00024420 | 0.00000000 | 0.00007309 | 0.00000000 | 0.00000000 |
| OTU_595 (Capnocytophaga)              | 0.00000000 | 0.00000000 | 0.00034660 | 0.00000000 | 0.00000000 | 0.00015936 |
| OTU_596 (Iamia)                       | 0.00048229 | 0.00024420 | 0.00000000 | 0.00000000 | 0.00000000 | 0.00000000 |
| OTU_597<br>(TM7_genus_incertae_sedis) | 0.00000000 | 0.00024420 | 0.00000000 | 0.00000000 | 0.00000000 | 0.00000000 |
| OTU_598 (unclassified)                | 0.00000000 | 0.00048840 | 0.00000000 | 0.00000000 | 0.00000000 | 0.00000000 |
| OTU_599 (unclassified)                | 0.00082679 | 0.00000000 | 0.00000000 | 0.00000000 | 0.00000000 | 0.00000000 |
| OTU_600 (unclassified)                | 0.00000000 | 0.00040700 | 0.00000000 | 0.00000000 | 0.00000000 | 0.00000000 |
| OTU_601 (Bacillariophyta)             | 0.00000000 | 0.00008140 | 0.00048523 | 0.00007309 | 0.00000000 | 0.00007968 |
| OTU_602 (Gp4)                         | 0.00000000 | 0.00024420 | 0.00000000 | 0.00000000 | 0.00000000 | 0.00000000 |
| OTU_603 (unclassified)                | 0.00000000 | 0.00000000 | 0.00020796 | 0.00007309 | 0.00000000 | 0.00000000 |
| OTU_604 (unclassified)                | 0.00000000 | 0.00000000 | 0.00034660 | 0.00007309 | 0.00000000 | 0.00015936 |
| OTU_605 (unclassified)                | 0.00000000 | 0.00040700 | 0.00000000 | 0.00000000 | 0.00000000 | 0.00000000 |
| OTU_606<br>(TM7_genus_incertae_sedis) | 0.00000000 | 0.00105820 | 0.00000000 | 0.00000000 | 0.00000000 | 0.00000000 |
| OTU_607 (unclassified)                | 0.00000000 | 0.00065120 | 0.00000000 | 0.00000000 | 0.00000000 | 0.00000000 |
| OTU_608 (unclassified)                | 0.00000000 | 0.00000000 | 0.00034660 | 0.00000000 | 0.00000000 | 0.00000000 |
| OTU_609 (unclassified)                | 0.00000000 | 0.00040700 | 0.00006932 | 0.00000000 | 0.00000000 | 0.00000000 |
| OTU_610 (unclassified)                | 0.00000000 | 0.00073260 | 0.00000000 | 0.00000000 | 0.00000000 | 0.00007968 |
| OTU_611 (unclassified)                | 0.00000000 | 0.00040700 | 0.00062387 | 0.00007309 | 0.00008712 | 0.00023904 |
| OTU_612 (Paludibacter)                | 0.00000000 | 0.00040700 | 0.00000000 | 0.00000000 | 0.00000000 | 0.00000000 |
| OTU_613 (unclassified)                | 0.00000000 | 0.00000000 | 0.00000000 | 0.00021928 | 0.00017423 | 0.00031873 |

|                                       |            |            |            |            |            |            |
|---------------------------------------|------------|------------|------------|------------|------------|------------|
| OTU_614 (unclassified)                | 0.00000000 | 0.00065120 | 0.00000000 | 0.00000000 | 0.00000000 | 0.00000000 |
| OTU_615 (unclassified)                | 0.00000000 | 0.00032560 | 0.00034660 | 0.00043856 | 0.00034846 | 0.00023904 |
| OTU_616<br>(OD1_genus_incertae_sedis) | 0.00000000 | 0.00032560 | 0.00006932 | 0.00000000 | 0.00000000 | 0.00007968 |
| OTU_617 (unclassified)                | 0.00000000 | 0.00032560 | 0.00000000 | 0.00021928 | 0.00008712 | 0.00015936 |
| OTU_618 (unclassified)                | 0.00062009 | 0.00000000 | 0.00000000 | 0.00000000 | 0.00000000 | 0.00000000 |
| OTU_619 (Paracoccus)                  | 0.00013780 | 0.00000000 | 0.00090115 | 0.00036547 | 0.00043558 | 0.00047809 |
| OTU_620 (Bacillariophyta)             | 0.00000000 | 0.00032560 | 0.00055455 | 0.00000000 | 0.00000000 | 0.00015936 |
| OTU_621 (unclassified)                | 0.00000000 | 0.00000000 | 0.00000000 | 0.00021928 | 0.00348462 | 0.00000000 |
| OTU_622 (Carboxydocella)              | 0.00048229 | 0.00000000 | 0.00006932 | 0.00000000 | 0.00034846 | 0.00000000 |
| OTU_623<br>(OD1_genus_incertae_sedis) | 0.00000000 | 0.00024420 | 0.00013864 | 0.00029238 | 0.00000000 | 0.00000000 |
| OTU_624<br>(OD1_genus_incertae_sedis) | 0.00000000 | 0.00211640 | 0.00048523 | 0.00131569 | 0.00008712 | 0.00015936 |
| OTU_625 (unclassified)                | 0.00000000 | 0.00024420 | 0.00000000 | 0.00000000 | 0.00000000 | 0.00000000 |
| OTU_626<br>(OD1_genus_incertae_sedis) | 0.00000000 | 0.00000000 | 0.00041592 | 0.00000000 | 0.00000000 | 0.00015936 |
| OTU_627 (Gp3)                         | 0.00000000 | 0.00016280 | 0.00027728 | 0.00000000 | 0.00000000 | 0.00000000 |
| OTU_628 (unclassified)                | 0.00048229 | 0.00000000 | 0.00000000 | 0.00000000 | 0.00000000 | 0.00000000 |
| OTU_629 (Propionibacterium)           | 0.00020670 | 0.00024420 | 0.00000000 | 0.00000000 | 0.00000000 | 0.00000000 |
| OTU_630 (Kocuria)                     | 0.00000000 | 0.00000000 | 0.00069319 | 0.00000000 | 0.00000000 | 0.00000000 |
| OTU_631 (unclassified)                | 0.00013780 | 0.00000000 | 0.00000000 | 0.00000000 | 0.00000000 | 0.00000000 |
| OTU_632 (Tetragenococcus)             | 0.00020670 | 0.00113960 | 0.00131707 | 0.00299686 | 0.00200366 | 0.00191235 |
| OTU_633 (unclassified)                | 0.00041339 | 0.00000000 | 0.00000000 | 0.00000000 | 0.00000000 | 0.00000000 |
| OTU_634 (Pedomicrobium)               | 0.00130908 | 0.00016280 | 0.00000000 | 0.00000000 | 0.00000000 | 0.00000000 |
| OTU_635 (unclassified)                | 0.00020670 | 0.00000000 | 0.00000000 | 0.00000000 | 0.00000000 | 0.00000000 |
| OTU_636 (unclassified)                | 0.00027560 | 0.00000000 | 0.00000000 | 0.00000000 | 0.00000000 | 0.00000000 |
| OTU_637 (unclassified)                | 0.00034449 | 0.00000000 | 0.00000000 | 0.00000000 | 0.00000000 | 0.00000000 |
| OTU_638 (unclassified)                | 0.00034449 | 0.00048840 | 0.00027728 | 0.00080403 | 0.00008712 | 0.00047809 |
| OTU_639 (unclassified)                | 0.00055119 | 0.00000000 | 0.00000000 | 0.00051166 | 0.00000000 | 0.00000000 |
| OTU_640 (Bosea)                       | 0.00089569 | 0.00073260 | 0.00027728 | 0.00051166 | 0.00087116 | 0.00079681 |
| OTU_641 (unclassified)                | 0.00013780 | 0.00024420 | 0.00000000 | 0.00000000 | 0.00000000 | 0.00000000 |
| OTU_642 (unclassified)                | 0.00000000 | 0.00000000 | 0.00000000 | 0.00241210 | 0.00000000 | 0.00000000 |
| OTU_643 (Paenibacillus)               | 0.00000000 | 0.00000000 | 0.00000000 | 0.00197354 | 0.00078404 | 0.00191235 |
| OTU_644 (unclassified)                | 0.00000000 | 0.00000000 | 0.00000000 | 0.00007309 | 0.00008712 | 0.00000000 |
| OTU_645 (unclassified)                | 0.00020670 | 0.00000000 | 0.00000000 | 0.00007309 | 0.00000000 | 0.00000000 |
| OTU_646 (Ochrobactrum)                | 0.00006890 | 0.00065120 | 0.00110911 | 0.00131569 | 0.00217789 | 0.00191235 |
| OTU_647 (unclassified)                | 0.00055119 | 0.00000000 | 0.00000000 | 0.00000000 | 0.00000000 | 0.00000000 |
| OTU_648 (Halomonas)                   | 0.00006890 | 0.00008140 | 0.00013864 | 0.00043856 | 0.00026135 | 0.00007968 |
| OTU_649 (unclassified)                | 0.00034449 | 0.00016280 | 0.00000000 | 0.00000000 | 0.00000000 | 0.00000000 |
| OTU_650 (unclassified)                | 0.00020670 | 0.00000000 | 0.00000000 | 0.00000000 | 0.00000000 | 0.00000000 |
| OTU_651 (unclassified)                | 0.00137798 | 0.00000000 | 0.00000000 | 0.00000000 | 0.00000000 | 0.00000000 |
| OTU_652 (unclassified)                | 0.00034449 | 0.00000000 | 0.00000000 | 0.00000000 | 0.00000000 | 0.00000000 |
| OTU_653 (unclassified)                | 0.00000000 | 0.00000000 | 0.00000000 | 0.00000000 | 0.00043558 | 0.00039841 |
| OTU_654 (Hyphomicrobium)              | 0.00000000 | 0.00024420 | 0.00006932 | 0.00036547 | 0.00017423 | 0.00047809 |
| OTU_655 (unclassified)                | 0.00034449 | 0.00000000 | 0.00000000 | 0.00000000 | 0.00000000 | 0.00000000 |
| OTU_656 (Legionella)                  | 0.00013780 | 0.00000000 | 0.00000000 | 0.00000000 | 0.00000000 | 0.00000000 |
| OTU_657 (Iamia)                       | 0.00062009 | 0.00000000 | 0.00000000 | 0.00000000 | 0.00000000 | 0.00000000 |
| OTU_658 (Leucobacter)                 | 0.00013780 | 0.00008140 | 0.00000000 | 0.00000000 | 0.00000000 | 0.00000000 |
| OTU_659 (Ilumatobacter)               | 0.00000000 | 0.00000000 | 0.00013864 | 0.00029238 | 0.00026135 | 0.00071713 |
| OTU_660 (unclassified)                | 0.00027560 | 0.00000000 | 0.00000000 | 0.00000000 | 0.00000000 | 0.00000000 |

|                                       |            |            |            |            |            |            |
|---------------------------------------|------------|------------|------------|------------|------------|------------|
| OTU_661 (Gp5)                         | 0.00020670 | 0.00000000 | 0.00000000 | 0.00000000 | 0.00000000 | 0.00000000 |
| OTU_662 (unclassified)                | 0.00013780 | 0.00000000 | 0.00000000 | 0.00000000 | 0.00000000 | 0.00000000 |
| OTU_663 (unclassified)                | 0.00020670 | 0.00000000 | 0.00006932 | 0.00000000 | 0.00000000 | 0.00023904 |
| OTU_664 (unclassified)                | 0.00020670 | 0.00000000 | 0.00000000 | 0.00000000 | 0.00000000 | 0.00000000 |
| OTU_665 (Delftia)                     | 0.00000000 | 0.00008140 | 0.00041592 | 0.00204663 | 0.00017423 | 0.00079681 |
| OTU_666 (unclassified)                | 0.00000000 | 0.00000000 | 0.00034660 | 0.00021928 | 0.00000000 | 0.00000000 |
| OTU_667 (Aquicella)                   | 0.00020670 | 0.00000000 | 0.00000000 | 0.00000000 | 0.00000000 | 0.00000000 |
| OTU_668 (unclassified)                | 0.00013780 | 0.00000000 | 0.00000000 | 0.00000000 | 0.00000000 | 0.00000000 |
| OTU_669 (unclassified)                | 0.00013780 | 0.00000000 | 0.00000000 | 0.00000000 | 0.00000000 | 0.00000000 |
| OTU_670 (Thiothrix)                   | 0.00000000 | 0.00000000 | 0.00000000 | 0.00095022 | 0.00008712 | 0.00000000 |
| OTU_671 (unclassified)                | 0.00068899 | 0.00000000 | 0.00000000 | 0.00000000 | 0.00000000 | 0.00000000 |
| OTU_672 (unclassified)                | 0.00000000 | 0.00000000 | 0.00000000 | 0.00029238 | 0.00026135 | 0.00031873 |
| OTU_673 (unclassified)                | 0.00027560 | 0.00032560 | 0.00000000 | 0.00000000 | 0.00000000 | 0.00000000 |
| OTU_674 (unclassified)                | 0.00000000 | 0.00000000 | 0.00000000 | 0.00153498 | 0.00043558 | 0.00000000 |
| OTU_675 (Aquicella)                   | 0.00020670 | 0.00000000 | 0.00000000 | 0.00000000 | 0.00000000 | 0.00000000 |
| OTU_676 (Aquicola)                    | 0.00000000 | 0.00056980 | 0.00055455 | 0.00095022 | 0.00069692 | 0.00055777 |
| OTU_677<br>(TM7_genus_incertae_sedis) | 0.00000000 | 0.00016280 | 0.00013864 | 0.00029238 | 0.00000000 | 0.00000000 |
| OTU_678 (unclassified)                | 0.00041339 | 0.00000000 | 0.00000000 | 0.00000000 | 0.00000000 | 0.00000000 |
| OTU_679 (Nocardioides)                | 0.00020670 | 0.00000000 | 0.00000000 | 0.00000000 | 0.00000000 | 0.00000000 |
| OTU_680 (Bdellovibrio)                | 0.00000000 | 0.00008140 | 0.00027728 | 0.00007309 | 0.00000000 | 0.00007968 |
| OTU_681 (unclassified)                | 0.00013780 | 0.00000000 | 0.00027728 | 0.00000000 | 0.00008712 | 0.00000000 |
| OTU_682 (unclassified)                | 0.00013780 | 0.00000000 | 0.00000000 | 0.00000000 | 0.00000000 | 0.00000000 |
| OTU_683 (Lactobacillus)               | 0.00000000 | 0.00000000 | 0.00000000 | 0.00431255 | 0.00200366 | 0.00000000 |
| OTU_684 (unclassified)                | 0.00000000 | 0.00056980 | 0.00020796 | 0.00000000 | 0.00008712 | 0.00000000 |
| OTU_685 (unclassified)                | 0.00000000 | 0.00016280 | 0.00000000 | 0.00014619 | 0.00000000 | 0.00000000 |
| OTU_686 (unclassified)                | 0.00000000 | 0.00056980 | 0.00000000 | 0.00014619 | 0.00008712 | 0.00023904 |
| OTU_687 (unclassified)                | 0.00000000 | 0.00016280 | 0.00000000 | 0.00000000 | 0.00000000 | 0.00000000 |
| OTU_688 (unclassified)                | 0.00000000 | 0.00048840 | 0.00000000 | 0.00000000 | 0.00000000 | 0.00000000 |
| OTU_689 (Methyloversatilis)           | 0.00000000 | 0.00016280 | 0.00041592 | 0.00000000 | 0.00034846 | 0.00007968 |
| OTU_690 (unclassified)                | 0.00000000 | 0.00040700 | 0.00000000 | 0.00000000 | 0.00000000 | 0.00000000 |
| OTU_691 (unclassified)                | 0.00000000 | 0.00000000 | 0.00020796 | 0.00000000 | 0.00000000 | 0.00000000 |
| OTU_692 (unclassified)                | 0.00000000 | 0.00000000 | 0.00027728 | 0.00000000 | 0.00000000 | 0.00000000 |
| OTU_693 (unclassified)                | 0.00000000 | 0.00032560 | 0.00000000 | 0.00000000 | 0.00000000 | 0.00000000 |
| OTU_694 (unclassified)                | 0.00000000 | 0.00008140 | 0.00006932 | 0.00000000 | 0.00008712 | 0.00000000 |
| OTU_695 (unclassified)                | 0.00000000 | 0.00000000 | 0.00013864 | 0.00000000 | 0.00000000 | 0.00000000 |
| OTU_696 (unclassified)                | 0.00000000 | 0.00016280 | 0.00000000 | 0.00000000 | 0.00000000 | 0.00000000 |
| OTU_697 (unclassified)                | 0.00000000 | 0.00000000 | 0.00027728 | 0.00000000 | 0.00000000 | 0.00000000 |
| OTU_698 (unclassified)                | 0.00000000 | 0.00000000 | 0.00000000 | 0.00000000 | 0.00017423 | 0.00000000 |
| OTU_699 (unclassified)                | 0.00000000 | 0.00016280 | 0.00000000 | 0.00000000 | 0.00000000 | 0.00000000 |
| OTU_700 (unclassified)                | 0.00000000 | 0.00000000 | 0.00020796 | 0.00000000 | 0.00000000 | 0.00000000 |
| OTU_701 (Vogesella)                   | 0.00000000 | 0.00000000 | 0.00034660 | 0.00007309 | 0.00008712 | 0.00023904 |
| OTU_702 (unclassified)                | 0.00000000 | 0.00089540 | 0.00013864 | 0.00000000 | 0.00000000 | 0.00000000 |
| OTU_703 (Bacillariophyta)             | 0.00006890 | 0.00040700 | 0.00000000 | 0.00000000 | 0.00000000 | 0.00000000 |
| OTU_704 (unclassified)                | 0.00000000 | 0.00008140 | 0.00027728 | 0.00000000 | 0.00000000 | 0.00007968 |
| OTU_705 (unclassified)                | 0.00000000 | 0.00138380 | 0.00006932 | 0.00000000 | 0.00000000 | 0.00000000 |
| OTU_706 (unclassified)                | 0.00020670 | 0.00000000 | 0.00000000 | 0.00000000 | 0.00000000 | 0.00000000 |
| OTU_707 (Flavobacterium)              | 0.00027560 | 0.00000000 | 0.00000000 | 0.00000000 | 0.00000000 | 0.00000000 |
| OTU_708 (unclassified)                | 0.00000000 | 0.00000000 | 0.00000000 | 0.00014619 | 0.00000000 | 0.00000000 |
| OTU_709 (unclassified)                | 0.00013780 | 0.00000000 | 0.00000000 | 0.00000000 | 0.00000000 | 0.00000000 |
| OTU_710 (Aquicella)                   | 0.00020670 | 0.00000000 | 0.00000000 | 0.00000000 | 0.00000000 | 0.00000000 |

|                                        |            |            |            |            |            |            |
|----------------------------------------|------------|------------|------------|------------|------------|------------|
| OTU_711 (Sandaracinobacter)            | 0.00062009 | 0.00000000 | 0.00000000 | 0.00000000 | 0.00000000 | 0.00000000 |
| OTU_712 (Legionella)                   | 0.00055119 | 0.00000000 | 0.00000000 | 0.00000000 | 0.00000000 | 0.00000000 |
| OTU_713<br>(TM7_genus_incertae_sedis)  | 0.00041339 | 0.00000000 | 0.00000000 | 0.00000000 | 0.00000000 | 0.00000000 |
| OTU_714 (unclassified)                 | 0.00192917 | 0.00000000 | 0.00000000 | 0.00007309 | 0.00000000 | 0.00000000 |
| OTU_715 (Patulibacter)                 | 0.00027560 | 0.00000000 | 0.00000000 | 0.00029238 | 0.00000000 | 0.00000000 |
| OTU_716 (unclassified)                 | 0.00027560 | 0.00000000 | 0.00000000 | 0.00000000 | 0.00000000 | 0.00000000 |
| OTU_717 (unclassified)                 | 0.00000000 | 0.00000000 | 0.00013864 | 0.00000000 | 0.00000000 | 0.00023904 |
| OTU_718 (Microbacterium)               | 0.00000000 | 0.00000000 | 0.00000000 | 0.00000000 | 0.00026135 | 0.00055777 |
| OTU_719 (unclassified)                 | 0.00117128 | 0.00000000 | 0.00000000 | 0.00000000 | 0.00000000 | 0.00000000 |
| OTU_720 (Roseomonas)                   | 0.00048229 | 0.00000000 | 0.00000000 | 0.00000000 | 0.00000000 | 0.00000000 |
| OTU_721 (Legionella)                   | 0.00020670 | 0.00000000 | 0.00000000 | 0.00000000 | 0.00000000 | 0.00000000 |
| OTU_722 (Clostridium_XI)               | 0.00027560 | 0.00000000 | 0.00000000 | 0.00000000 | 0.00000000 | 0.00000000 |
| OTU_723 (unclassified)                 | 0.00013780 | 0.00000000 | 0.00000000 | 0.00000000 | 0.00000000 | 0.00000000 |
| OTU_724<br>(Clostridium_sensu_stricto) | 0.00516742 | 0.00000000 | 0.00000000 | 0.00000000 | 0.00000000 | 0.00000000 |
| OTU_725 (unclassified)                 | 0.00034449 | 0.00000000 | 0.00000000 | 0.00007309 | 0.00000000 | 0.00000000 |
| OTU_726<br>(Clostridium_sensu_stricto) | 0.00027560 | 0.00000000 | 0.00000000 | 0.00000000 | 0.00000000 | 0.00000000 |
| OTU_727 (unclassified)                 | 0.00020670 | 0.00000000 | 0.00000000 | 0.00000000 | 0.00000000 | 0.00000000 |
| OTU_728 (Gp11)                         | 0.00013780 | 0.00000000 | 0.00000000 | 0.00000000 | 0.00000000 | 0.00000000 |
| OTU_729 (unclassified)                 | 0.00013780 | 0.00040700 | 0.00027728 | 0.00000000 | 0.00008712 | 0.00000000 |
| OTU_730 (unclassified)                 | 0.00062009 | 0.00000000 | 0.00000000 | 0.00000000 | 0.00000000 | 0.00000000 |
| OTU_731 (unclassified)                 | 0.00000000 | 0.00048840 | 0.00000000 | 0.00000000 | 0.00008712 | 0.00000000 |
| OTU_732 (unclassified)                 | 0.00000000 | 0.00016280 | 0.00000000 | 0.00000000 | 0.00000000 | 0.00000000 |
| OTU_733 (unclassified)                 | 0.00000000 | 0.00162800 | 0.00097047 | 0.00051166 | 0.00069692 | 0.00031873 |
| OTU_734 (unclassified)                 | 0.00000000 | 0.00032560 | 0.00000000 | 0.00000000 | 0.00000000 | 0.00000000 |
| OTU_735 (Corynebacterium)              | 0.00000000 | 0.00122100 | 0.00000000 | 0.00000000 | 0.00000000 | 0.00000000 |
| OTU_736 (unclassified)                 | 0.00000000 | 0.00040700 | 0.00020796 | 0.00014619 | 0.00000000 | 0.00000000 |
| OTU_737 (unclassified)                 | 0.00013780 | 0.00000000 | 0.00000000 | 0.00000000 | 0.00000000 | 0.00000000 |
| OTU_738 (unclassified)                 | 0.00027560 | 0.00000000 | 0.00000000 | 0.00000000 | 0.00000000 | 0.00000000 |
| OTU_739 (Geobacillus)                  | 0.00020670 | 0.00008140 | 0.00041592 | 0.00073094 | 0.00034846 | 0.00007968 |
| OTU_740 (unclassified)                 | 0.00034449 | 0.00000000 | 0.00000000 | 0.00000000 | 0.00000000 | 0.00000000 |
| OTU_741 (unclassified)                 | 0.00062009 | 0.00000000 | 0.00000000 | 0.00000000 | 0.00000000 | 0.00000000 |
| OTU_742 (unclassified)                 | 0.00020670 | 0.00000000 | 0.00000000 | 0.00000000 | 0.00000000 | 0.00000000 |
| OTU_743 (unclassified)                 | 0.00000000 | 0.00000000 | 0.00020796 | 0.00007309 | 0.00017423 | 0.00039841 |
| OTU_744 (unclassified)                 | 0.00027560 | 0.00000000 | 0.00000000 | 0.00000000 | 0.00000000 | 0.00000000 |
| OTU_745 (unclassified)                 | 0.00041339 | 0.00000000 | 0.00000000 | 0.00000000 | 0.00000000 | 0.00000000 |
| OTU_746 (Legionella)                   | 0.00034449 | 0.00000000 | 0.00000000 | 0.00014619 | 0.00000000 | 0.00007968 |
| OTU_747 (Legionella)                   | 0.00000000 | 0.00016280 | 0.00020796 | 0.00021928 | 0.00017423 | 0.00007968 |
| OTU_748 (Aquicella)                    | 0.00041339 | 0.00000000 | 0.00000000 | 0.00000000 | 0.00000000 | 0.00000000 |
| OTU_749 (unclassified)                 | 0.00048229 | 0.00000000 | 0.00000000 | 0.00000000 | 0.00000000 | 0.00000000 |
| OTU_750 (unclassified)                 | 0.00027560 | 0.00000000 | 0.00000000 | 0.00000000 | 0.00000000 | 0.00000000 |
| OTU_751 (unclassified)                 | 0.00096459 | 0.00000000 | 0.00000000 | 0.00000000 | 0.00000000 | 0.00000000 |
| OTU_752 (unclassified)                 | 0.00027560 | 0.00000000 | 0.00000000 | 0.00000000 | 0.00000000 | 0.00000000 |
| OTU_753<br>(TM7_genus_incertae_sedis)  | 0.00027560 | 0.00000000 | 0.00000000 | 0.00000000 | 0.00000000 | 0.00000000 |
| OTU_754 (unclassified)                 | 0.00062009 | 0.00000000 | 0.00006932 | 0.00000000 | 0.00000000 | 0.00000000 |
| OTU_755 (unclassified)                 | 0.00013780 | 0.00000000 | 0.00000000 | 0.00000000 | 0.00000000 | 0.00000000 |
| OTU_756 (unclassified)                 | 0.00055119 | 0.00000000 | 0.00000000 | 0.00000000 | 0.00000000 | 0.00000000 |
| OTU_757 (unclassified)                 | 0.00062009 | 0.00000000 | 0.00000000 | 0.00000000 | 0.00000000 | 0.00000000 |



|                                       |            |            |            |            |            |            |
|---------------------------------------|------------|------------|------------|------------|------------|------------|
| OTU_758 (unclassified)                | 0.00192917 | 0.00000000 | 0.00000000 | 0.00000000 | 0.00000000 | 0.00000000 |
| OTU_759<br>(TM7_genus_incertae_sedis) | 0.00000000 | 0.00000000 | 0.00000000 | 0.00087713 | 0.00000000 | 0.00007968 |
| OTU_760 (unclassified)                | 0.00020670 | 0.00000000 | 0.00000000 | 0.00000000 | 0.00000000 | 0.00000000 |
| OTU_761 (unclassified)                | 0.00013780 | 0.00000000 | 0.00000000 | 0.00000000 | 0.00000000 | 0.00000000 |
| OTU_762 (unclassified)                | 0.00000000 | 0.00000000 | 0.00006932 | 0.00051166 | 0.00000000 | 0.00023904 |
| OTU_763 (unclassified)                | 0.00013780 | 0.00000000 | 0.00000000 | 0.00000000 | 0.00000000 | 0.00000000 |
| OTU_764 (unclassified)                | 0.00013780 | 0.00000000 | 0.00000000 | 0.00000000 | 0.00000000 | 0.00000000 |
| OTU_765<br>(OD1_genus_incertae_sedis) | 0.00000000 | 0.00000000 | 0.00000000 | 0.00043856 | 0.00000000 | 0.00007968 |
| OTU_766 (unclassified)                | 0.00000000 | 0.00040700 | 0.00000000 | 0.00000000 | 0.00000000 | 0.00000000 |
| OTU_767 (unclassified)                | 0.00000000 | 0.00000000 | 0.00000000 | 0.00007309 | 0.00008712 | 0.00007968 |
| OTU_768 (Legionella)                  | 0.00000000 | 0.00065120 | 0.00034660 | 0.00021928 | 0.00034846 | 0.00047809 |
| OTU_769 (unclassified)                | 0.00000000 | 0.00089540 | 0.00000000 | 0.00000000 | 0.00000000 | 0.00000000 |
| OTU_770 (unclassified)                | 0.00000000 | 0.00048840 | 0.00000000 | 0.00000000 | 0.00000000 | 0.00000000 |
| OTU_771 (unclassified)                | 0.00000000 | 0.00016280 | 0.00000000 | 0.00000000 | 0.00000000 | 0.00000000 |
| OTU_772 (unclassified)                | 0.00000000 | 0.00024420 | 0.00000000 | 0.00036547 | 0.00000000 | 0.00015936 |
| OTU_773 (Weissella)                   | 0.00000000 | 0.00000000 | 0.00000000 | 0.00065785 | 0.00365886 | 0.00000000 |
| OTU_774<br>(TM7_genus_incertae_sedis) | 0.00006890 | 0.00024420 | 0.00000000 | 0.00000000 | 0.00000000 | 0.00000000 |
| OTU_775 (unclassified)                | 0.00000000 | 0.00048840 | 0.00006932 | 0.00000000 | 0.00000000 | 0.00000000 |
| OTU_776 (unclassified)                | 0.00000000 | 0.00016280 | 0.00000000 | 0.00000000 | 0.00000000 | 0.00000000 |
| OTU_777 (unclassified)                | 0.00000000 | 0.00024420 | 0.00000000 | 0.00000000 | 0.00000000 | 0.00000000 |
| OTU_778 (unclassified)                | 0.00000000 | 0.00016280 | 0.00027728 | 0.00021928 | 0.00000000 | 0.00007968 |
| OTU_779 (unclassified)                | 0.00000000 | 0.00032560 | 0.00000000 | 0.00000000 | 0.00000000 | 0.00000000 |
| OTU_780 (unclassified)                | 0.00000000 | 0.00024420 | 0.00000000 | 0.00000000 | 0.00000000 | 0.00000000 |
| OTU_781 (unclassified)                | 0.00000000 | 0.00048840 | 0.00013864 | 0.00000000 | 0.00008712 | 0.00000000 |
| OTU_782 (unclassified)                | 0.00000000 | 0.00040700 | 0.00000000 | 0.00000000 | 0.00034846 | 0.00007968 |
| OTU_783 (unclassified)                | 0.00000000 | 0.00016280 | 0.00000000 | 0.00000000 | 0.00000000 | 0.00000000 |
| OTU_784 (unclassified)                | 0.00000000 | 0.00040700 | 0.00000000 | 0.00000000 | 0.00000000 | 0.00000000 |
| OTU_785 (Legionella)                  | 0.00000000 | 0.00000000 | 0.00006932 | 0.00014619 | 0.00000000 | 0.00031873 |
| OTU_786 (unclassified)                | 0.00000000 | 0.00016280 | 0.00000000 | 0.00000000 | 0.00000000 | 0.00000000 |
| OTU_787 (unclassified)                | 0.00000000 | 0.00056980 | 0.00069319 | 0.00219282 | 0.00200366 | 0.00127490 |
| OTU_788 (unclassified)                | 0.00034449 | 0.00000000 | 0.00000000 | 0.00000000 | 0.00000000 | 0.00000000 |
| OTU_789 (unclassified)                | 0.00013780 | 0.00097680 | 0.00000000 | 0.00029238 | 0.00034846 | 0.00007968 |
| OTU_790 (Gp3)                         | 0.00000000 | 0.00016280 | 0.00000000 | 0.00000000 | 0.00000000 | 0.00000000 |
| OTU_791 (unclassified)                | 0.00006890 | 0.00032560 | 0.00000000 | 0.00007309 | 0.00000000 | 0.00000000 |
| OTU_792 (unclassified)                | 0.00000000 | 0.00089540 | 0.00000000 | 0.00000000 | 0.00000000 | 0.00000000 |
| OTU_793 (Bacteriovorax)               | 0.00000000 | 0.00024420 | 0.00006932 | 0.00000000 | 0.00000000 | 0.00000000 |
| OTU_794 (Gluconobacter)               | 0.00000000 | 0.00000000 | 0.00000000 | 0.00007309 | 0.00060981 | 0.00000000 |
| OTU_795 (unclassified)                | 0.00000000 | 0.00040700 | 0.00000000 | 0.00000000 | 0.00000000 | 0.00000000 |
| OTU_796 (unclassified)                | 0.00000000 | 0.00016280 | 0.00000000 | 0.00000000 | 0.00000000 | 0.00000000 |
| OTU_797<br>(TM7_genus_incertae_sedis) | 0.00000000 | 0.00024420 | 0.00000000 | 0.00000000 | 0.00000000 | 0.00000000 |
| OTU_798 (unclassified)                | 0.00000000 | 0.00000000 | 0.00013864 | 0.00051166 | 0.00000000 | 0.00000000 |
| OTU_799 (unclassified)                | 0.00075789 | 0.00000000 | 0.00000000 | 0.00000000 | 0.00000000 | 0.00000000 |
| OTU_800 (unclassified)                | 0.00020670 | 0.00024420 | 0.00000000 | 0.00000000 | 0.00000000 | 0.00000000 |
| OTU_801 (Ilumatobacter)               | 0.00027560 | 0.00000000 | 0.00000000 | 0.00000000 | 0.00000000 | 0.00000000 |
| OTU_802 (unclassified)                | 0.00027560 | 0.00000000 | 0.00000000 | 0.00000000 | 0.00000000 | 0.00000000 |
| OTU_803 (unclassified)                | 0.00027560 | 0.00000000 | 0.00000000 | 0.00000000 | 0.00000000 | 0.00000000 |
| OTU_804 (unclassified)                | 0.00048229 | 0.00000000 | 0.00000000 | 0.00000000 | 0.00000000 | 0.00000000 |

|                                        |            |            |            |            |            |            |
|----------------------------------------|------------|------------|------------|------------|------------|------------|
| OTU_805 (unclassified)                 | 0.00034449 | 0.00000000 | 0.00000000 | 0.00000000 | 0.00000000 | 0.00000000 |
| OTU_806 (unclassified)                 | 0.00000000 | 0.00000000 | 0.00000000 | 0.00021928 | 0.00008712 | 0.00007968 |
| OTU_807 (unclassified)                 | 0.00000000 | 0.00008140 | 0.00000000 | 0.00029238 | 0.00017423 | 0.00015936 |
| OTU_808 (unclassified)                 | 0.00027560 | 0.00000000 | 0.00000000 | 0.00000000 | 0.00000000 | 0.00000000 |
| OTU_809 (unclassified)                 | 0.00020670 | 0.00000000 | 0.00000000 | 0.00000000 | 0.00000000 | 0.00000000 |
| OTU_810 (unclassified)                 | 0.00055119 | 0.00000000 | 0.00000000 | 0.00000000 | 0.00000000 | 0.00000000 |
| OTU_811 (unclassified)                 | 0.00000000 | 0.00000000 | 0.00006932 | 0.00043856 | 0.00000000 | 0.00047809 |
| OTU_812 (unclassified)                 | 0.00013780 | 0.00000000 | 0.00000000 | 0.00000000 | 0.00000000 | 0.00000000 |
| OTU_813 (unclassified)                 | 0.00013780 | 0.00024420 | 0.00000000 | 0.00000000 | 0.00000000 | 0.00000000 |
| OTU_814 (unclassified)                 | 0.00034449 | 0.00000000 | 0.00000000 | 0.00000000 | 0.00000000 | 0.00000000 |
| OTU_815 (Corynebacterium)              | 0.00000000 | 0.00016280 | 0.00020796 | 0.00058475 | 0.00008712 | 0.00055777 |
| OTU_816 (unclassified)                 | 0.00013780 | 0.00000000 | 0.00000000 | 0.00000000 | 0.00000000 | 0.00000000 |
| OTU_817 (Aquicella)                    | 0.00013780 | 0.00000000 | 0.00000000 | 0.00000000 | 0.00000000 | 0.00000000 |
| OTU_818<br>(Clostridium_sensu_stricto) | 0.00013780 | 0.00000000 | 0.00000000 | 0.00000000 | 0.00000000 | 0.00000000 |
| OTU_819 (Legionella)                   | 0.00013780 | 0.00000000 | 0.00000000 | 0.00000000 | 0.00000000 | 0.00000000 |
| OTU_820 (unclassified)                 | 0.00041339 | 0.00032560 | 0.00013864 | 0.00000000 | 0.00017423 | 0.00023904 |
| OTU_821 (unclassified)                 | 0.00041339 | 0.00000000 | 0.00000000 | 0.00000000 | 0.00000000 | 0.00000000 |
| OTU_822 (Chryseobacterium)             | 0.00006890 | 0.00024420 | 0.00000000 | 0.00000000 | 0.00000000 | 0.00000000 |
| OTU_823 (unclassified)                 | 0.00103348 | 0.00000000 | 0.00000000 | 0.00000000 | 0.00000000 | 0.00000000 |
| OTU_824 (unclassified)                 | 0.00020670 | 0.00000000 | 0.00000000 | 0.00000000 | 0.00000000 | 0.00000000 |
| OTU_825 (unclassified)                 | 0.00013780 | 0.00000000 | 0.00000000 | 0.00000000 | 0.00000000 | 0.00000000 |
| OTU_826 (unclassified)                 | 0.00020670 | 0.00000000 | 0.00000000 | 0.00000000 | 0.00000000 | 0.00000000 |
| OTU_827 (unclassified)                 | 0.00013780 | 0.00000000 | 0.00000000 | 0.00000000 | 0.00000000 | 0.00000000 |
| OTU_828 (unclassified)                 | 0.00013780 | 0.00000000 | 0.00000000 | 0.00000000 | 0.00000000 | 0.00000000 |
| OTU_829 (Roseomonas)                   | 0.00013780 | 0.00000000 | 0.00000000 | 0.00000000 | 0.00000000 | 0.00000000 |
| OTU_830 (Gp5)                          | 0.00027560 | 0.00000000 | 0.00000000 | 0.00000000 | 0.00000000 | 0.00000000 |
| OTU_831 (unclassified)                 | 0.00034449 | 0.00000000 | 0.00000000 | 0.00021928 | 0.00000000 | 0.00000000 |
| OTU_832 (unclassified)                 | 0.00013780 | 0.00000000 | 0.00000000 | 0.00000000 | 0.00000000 | 0.00000000 |
| OTU_833 (unclassified)                 | 0.00013780 | 0.00000000 | 0.00000000 | 0.00000000 | 0.00000000 | 0.00000000 |
| OTU_834 (unclassified)                 | 0.00000000 | 0.00040700 | 0.00000000 | 0.00000000 | 0.00052269 | 0.00055777 |
| OTU_835 (unclassified)                 | 0.00034449 | 0.00000000 | 0.00000000 | 0.00000000 | 0.00000000 | 0.00000000 |
| OTU_836 (Nocardioides)                 | 0.00020670 | 0.00000000 | 0.00000000 | 0.00000000 | 0.00000000 | 0.00000000 |
| OTU_837 (Legionella)                   | 0.00013780 | 0.00000000 | 0.00000000 | 0.00000000 | 0.00000000 | 0.00000000 |
| OTU_838 (Gp6)                          | 0.00034449 | 0.00000000 | 0.00000000 | 0.00000000 | 0.00000000 | 0.00000000 |
| OTU_839 (unclassified)                 | 0.00344495 | 0.00000000 | 0.00000000 | 0.00051166 | 0.00017423 | 0.00000000 |
| OTU_840 (unclassified)                 | 0.00013780 | 0.00000000 | 0.00000000 | 0.00000000 | 0.00000000 | 0.00000000 |
| OTU_841 (unclassified)                 | 0.00027560 | 0.00000000 | 0.00000000 | 0.00000000 | 0.00000000 | 0.00000000 |
| OTU_842 (unclassified)                 | 0.00027560 | 0.00000000 | 0.00000000 | 0.00000000 | 0.00000000 | 0.00000000 |
| OTU_843 (unclassified)                 | 0.00013780 | 0.00000000 | 0.00000000 | 0.00000000 | 0.00000000 | 0.00000000 |
| OTU_844 (unclassified)                 | 0.00117128 | 0.00000000 | 0.00000000 | 0.00000000 | 0.00000000 | 0.00000000 |
| OTU_845 (unclassified)                 | 0.00013780 | 0.00000000 | 0.00000000 | 0.00000000 | 0.00000000 | 0.00000000 |
| OTU_846 (Hyphomicrobium)               | 0.00020670 | 0.00000000 | 0.00000000 | 0.00000000 | 0.00000000 | 0.00000000 |
| OTU_847 (unclassified)                 | 0.00013780 | 0.00000000 | 0.00000000 | 0.00000000 | 0.00000000 | 0.00000000 |
| OTU_848 (unclassified)                 | 0.00000000 | 0.00000000 | 0.00000000 | 0.00043856 | 0.00000000 | 0.00031873 |
| OTU_849 (unclassified)                 | 0.00013780 | 0.00000000 | 0.00000000 | 0.00000000 | 0.00000000 | 0.00000000 |
| OTU_850 (unclassified)                 | 0.00034449 | 0.00000000 | 0.00000000 | 0.00000000 | 0.00000000 | 0.00000000 |
| OTU_851 (Aquicella)                    | 0.00013780 | 0.00000000 | 0.00000000 | 0.00000000 | 0.00000000 | 0.00000000 |
| OTU_852 (Acinetobacter)                | 0.00048229 | 0.00081400 | 0.00083183 | 0.00080403 | 0.00121962 | 0.00071713 |
| OTU_853 (unclassified)                 | 0.00034449 | 0.00000000 | 0.00000000 | 0.00007309 | 0.00000000 | 0.00000000 |
| OTU_854 (unclassified)                 | 0.00027560 | 0.00000000 | 0.00000000 | 0.00000000 | 0.00000000 | 0.00000000 |

|                                          |            |            |            |            |            |            |
|------------------------------------------|------------|------------|------------|------------|------------|------------|
| OTU_855 (unclassified)                   | 0.00020670 | 0.00000000 | 0.00000000 | 0.00000000 | 0.00000000 | 0.00000000 |
| OTU_856 (unclassified)                   | 0.00000000 | 0.00097680 | 0.00110911 | 0.00021928 | 0.00008712 | 0.00366534 |
| OTU_857 (unclassified)                   | 0.00034449 | 0.00000000 | 0.00000000 | 0.00000000 | 0.00000000 | 0.00000000 |
| OTU_858 (unclassified)                   | 0.00020670 | 0.00000000 | 0.00000000 | 0.00000000 | 0.00000000 | 0.00000000 |
| OTU_859 (Legionella)                     | 0.00013780 | 0.00000000 | 0.00000000 | 0.00000000 | 0.00000000 | 0.00000000 |
| OTU_860 (unclassified)                   | 0.00000000 | 0.00097680 | 0.00000000 | 0.00007309 | 0.00008712 | 0.00000000 |
| OTU_861 (unclassified)                   | 0.00000000 | 0.00032560 | 0.00006932 | 0.00000000 | 0.00000000 | 0.00055777 |
| OTU_862 (unclassified)                   | 0.00000000 | 0.00016280 | 0.00000000 | 0.00000000 | 0.00000000 | 0.00000000 |
| OTU_863 (unclassified)                   | 0.00000000 | 0.00048840 | 0.00000000 | 0.00000000 | 0.00000000 | 0.00000000 |
| OTU_864 (unclassified)                   | 0.00000000 | 0.00097680 | 0.00069319 | 0.00131569 | 0.00121962 | 0.00135458 |
| OTU_865 (unclassified)                   | 0.00000000 | 0.00016280 | 0.00000000 | 0.00000000 | 0.00000000 | 0.00000000 |
| OTU_866 (Flavobacterium)                 | 0.00000000 | 0.00065120 | 0.00041592 | 0.00007309 | 0.00000000 | 0.00015936 |
| OTU_867 (unclassified)                   | 0.00000000 | 0.00040700 | 0.00000000 | 0.00000000 | 0.00000000 | 0.00000000 |
| OTU_868 (Legionella)                     | 0.00000000 | 0.00040700 | 0.00000000 | 0.00000000 | 0.00000000 | 0.00000000 |
| OTU_869 (unclassified)                   | 0.00000000 | 0.00032560 | 0.00041592 | 0.00007309 | 0.00017423 | 0.00015936 |
| OTU_870 (Bryobacter)                     | 0.00000000 | 0.00040700 | 0.00000000 | 0.00000000 | 0.00000000 | 0.00000000 |
| OTU_871 (Aquiflexum)                     | 0.00000000 | 0.00016280 | 0.00006932 | 0.00000000 | 0.00000000 | 0.00000000 |
| OTU_872 (unclassified)                   | 0.00000000 | 0.00000000 | 0.00055455 | 0.00065785 | 0.00000000 | 0.00000000 |
| OTU_873 (Azospira)                       | 0.00000000 | 0.00024420 | 0.00000000 | 0.00000000 | 0.00000000 | 0.00000000 |
| OTU_874 (unclassified)                   | 0.00000000 | 0.00016280 | 0.00027728 | 0.00000000 | 0.00000000 | 0.00000000 |
| OTU_875 (unclassified)                   | 0.00000000 | 0.00032560 | 0.00000000 | 0.00000000 | 0.00000000 | 0.00000000 |
| OTU_876 (unclassified)                   | 0.00000000 | 0.00000000 | 0.00055455 | 0.00000000 | 0.00026135 | 0.00000000 |
| OTU_877 (unclassified)                   | 0.00000000 | 0.00000000 | 0.00034660 | 0.00014619 | 0.00026135 | 0.00015936 |
| OTU_878 (unclassified)                   | 0.00000000 | 0.00000000 | 0.00027728 | 0.00000000 | 0.00017423 | 0.00000000 |
| OTU_879 (unclassified)                   | 0.00000000 | 0.00000000 | 0.00020796 | 0.00000000 | 0.00000000 | 0.00000000 |
| OTU_880 (unclassified)                   | 0.00000000 | 0.00048840 | 0.00000000 | 0.00000000 | 0.00000000 | 0.00000000 |
| OTU_881 (unclassified)                   | 0.00000000 | 0.00016280 | 0.00000000 | 0.00000000 | 0.00000000 | 0.00000000 |
| OTU_882 (unclassified)                   | 0.00000000 | 0.00024420 | 0.00000000 | 0.00000000 | 0.00000000 | 0.00000000 |
| OTU_883 (unclassified)                   | 0.00000000 | 0.00040700 | 0.00000000 | 0.00000000 | 0.00000000 | 0.00000000 |
| OTU_884 (unclassified)                   | 0.00000000 | 0.00024420 | 0.00000000 | 0.00000000 | 0.00000000 | 0.00000000 |
| OTU_885<br>(TM7_genus_incertainae_sedis) | 0.00000000 | 0.00024420 | 0.00000000 | 0.00000000 | 0.00000000 | 0.00000000 |
| OTU_886 (unclassified)                   | 0.00000000 | 0.00179080 | 0.00187162 | 0.00190045 | 0.00270058 | 0.00350598 |
| OTU_887 (Catenibacterium)                | 0.00000000 | 0.00016280 | 0.00000000 | 0.00000000 | 0.00000000 | 0.00000000 |
| OTU_888 (unclassified)                   | 0.00000000 | 0.00000000 | 0.00000000 | 0.00029238 | 0.00000000 | 0.00000000 |
| OTU_889<br>(OD1_genus_incertainae_sedis) | 0.00000000 | 0.00032560 | 0.00000000 | 0.00000000 | 0.00000000 | 0.00000000 |
| OTU_890<br>(OD1_genus_incertainae_sedis) | 0.00000000 | 0.00048840 | 0.00020796 | 0.00000000 | 0.00008712 | 0.00000000 |
| OTU_891 (Flavobacterium)                 | 0.00000000 | 0.00008140 | 0.00027728 | 0.00051166 | 0.00000000 | 0.00000000 |
| OTU_892 (unclassified)                   | 0.00000000 | 0.00056980 | 0.00000000 | 0.00007309 | 0.00008712 | 0.00000000 |
| OTU_893 (unclassified)                   | 0.00000000 | 0.00016280 | 0.00000000 | 0.00000000 | 0.00000000 | 0.00000000 |
| OTU_894 (unclassified)                   | 0.00000000 | 0.00024420 | 0.00000000 | 0.00000000 | 0.00000000 | 0.00000000 |
| OTU_895 (Caedibacter)                    | 0.00000000 | 0.00081400 | 0.00000000 | 0.00000000 | 0.00008712 | 0.00000000 |
| OTU_896 (unclassified)                   | 0.00000000 | 0.00065120 | 0.00020796 | 0.00014619 | 0.00008712 | 0.00000000 |
| OTU_897 (unclassified)                   | 0.00000000 | 0.00024420 | 0.00000000 | 0.00000000 | 0.00000000 | 0.00000000 |
| OTU_898<br>(TM7_genus_incertainae_sedis) | 0.00000000 | 0.00040700 | 0.00000000 | 0.00000000 | 0.00000000 | 0.00000000 |
| OTU_899 (unclassified)                   | 0.00000000 | 0.00016280 | 0.00000000 | 0.00000000 | 0.00000000 | 0.00000000 |
| OTU_900 (Rhizobacter)                    | 0.00020670 | 0.00008140 | 0.00097047 | 0.00036547 | 0.00017423 | 0.00047809 |
| OTU_901 (Bacillus)                       | 0.00006890 | 0.00000000 | 0.00013864 | 0.00000000 | 0.00000000 | 0.00015936 |

|                            |            |            |            |            |            |            |
|----------------------------|------------|------------|------------|------------|------------|------------|
| OTU_902 (Achromobacter)    | 0.00000000 | 0.00105820 | 0.00034660 | 0.00036547 | 0.00078404 | 0.00023904 |
| OTU_903 (Acinetobacter)    | 0.00000000 | 0.00000000 | 0.00000000 | 0.00007309 | 0.00034846 | 0.00023904 |
| OTU_904 (Rubrobacter)      | 0.00000000 | 0.00024420 | 0.00006932 | 0.00000000 | 0.00008712 | 0.00015936 |
| OTU_905 (unclassified)     | 0.00000000 | 0.00016280 | 0.00000000 | 0.00000000 | 0.00000000 | 0.00000000 |
| OTU_906 (unclassified)     | 0.00000000 | 0.00000000 | 0.00020796 | 0.00000000 | 0.00000000 | 0.00000000 |
| OTU_907 (unclassified)     | 0.00000000 | 0.00000000 | 0.00027728 | 0.00000000 | 0.00000000 | 0.00000000 |
| OTU_908 (unclassified)     | 0.00000000 | 0.00008140 | 0.00027728 | 0.00007309 | 0.00000000 | 0.00000000 |
| OTU_909 (Undibacterium)    | 0.00000000 | 0.00016280 | 0.00062387 | 0.00014619 | 0.00000000 | 0.00007968 |
| OTU_910 (unclassified)     | 0.00000000 | 0.00000000 | 0.00020796 | 0.00000000 | 0.00000000 | 0.00000000 |
| OTU_911 (unclassified)     | 0.00000000 | 0.00016280 | 0.00027728 | 0.00036547 | 0.00069692 | 0.00087649 |
| OTU_912 (Polaromonas)      | 0.00000000 | 0.00000000 | 0.00020796 | 0.00000000 | 0.00008712 | 0.00015936 |
| OTU_913 (unclassified)     | 0.00000000 | 0.00000000 | 0.00041592 | 0.00000000 | 0.00000000 | 0.00031873 |
| OTU_914 (unclassified)     | 0.00000000 | 0.00000000 | 0.00000000 | 0.00000000 | 0.00095827 | 0.00047809 |
| OTU_915 (unclassified)     | 0.00000000 | 0.00000000 | 0.00000000 | 0.00000000 | 0.00043558 | 0.00023904 |
| OTU_916 (Streptococcus)    | 0.00000000 | 0.00000000 | 0.00055455 | 0.00014619 | 0.00000000 | 0.00023904 |
| OTU_917 (unclassified)     | 0.00000000 | 0.00008140 | 0.00013864 | 0.00000000 | 0.00000000 | 0.00000000 |
| OTU_918 (Cloacibacterium)  | 0.00000000 | 0.00008140 | 0.00034660 | 0.00007309 | 0.00069692 | 0.00031873 |
| OTU_919 (unclassified)     | 0.00000000 | 0.00000000 | 0.00013864 | 0.00000000 | 0.00000000 | 0.00000000 |
| OTU_920 (Lysobacter)       | 0.00000000 | 0.00000000 | 0.00013864 | 0.00014619 | 0.00008712 | 0.00007968 |
| OTU_921 (unclassified)     | 0.00000000 | 0.00032560 | 0.00034660 | 0.00000000 | 0.00000000 | 0.00000000 |
| OTU_922 (unclassified)     | 0.00000000 | 0.00000000 | 0.00041592 | 0.00000000 | 0.00000000 | 0.00000000 |
| OTU_923 (unclassified)     | 0.00000000 | 0.00000000 | 0.00041592 | 0.00043856 | 0.00008712 | 0.00007968 |
| OTU_924 (unclassified)     | 0.00000000 | 0.00008140 | 0.00041592 | 0.00000000 | 0.00000000 | 0.00015936 |
| OTU_925 (unclassified)     | 0.00000000 | 0.00000000 | 0.00027728 | 0.00000000 | 0.00000000 | 0.00015936 |
| OTU_926 (Luteolibacter)    | 0.00000000 | 0.00000000 | 0.00027728 | 0.00000000 | 0.00000000 | 0.00000000 |
| OTU_927 (Mucilaginibacter) | 0.00000000 | 0.00000000 | 0.00013864 | 0.00000000 | 0.00000000 | 0.00000000 |
| OTU_928 (unclassified)     | 0.00000000 | 0.00000000 | 0.00020796 | 0.00000000 | 0.00017423 | 0.00031873 |
| OTU_929 (Flectobacillus)   | 0.00006890 | 0.00000000 | 0.00041592 | 0.00007309 | 0.00000000 | 0.00000000 |
| OTU_930 (unclassified)     | 0.00000000 | 0.00000000 | 0.00013864 | 0.00000000 | 0.00000000 | 0.00000000 |
| OTU_931 (unclassified)     | 0.00000000 | 0.00000000 | 0.00020796 | 0.00000000 | 0.00000000 | 0.00000000 |
| OTU_932 (unclassified)     | 0.00000000 | 0.00016280 | 0.00090115 | 0.00014619 | 0.00000000 | 0.00007968 |
| OTU_933 (Legionella)       | 0.00000000 | 0.00000000 | 0.00000000 | 0.00000000 | 0.00034846 | 0.00000000 |
| OTU_934 (Streptococcus)    | 0.00000000 | 0.00040700 | 0.00000000 | 0.00007309 | 0.00017423 | 0.00000000 |
| OTU_935 (unclassified)     | 0.00000000 | 0.00065120 | 0.00000000 | 0.00014619 | 0.00008712 | 0.00007968 |
| OTU_936 (unclassified)     | 0.00000000 | 0.00073260 | 0.00000000 | 0.00000000 | 0.00000000 | 0.00007968 |
| OTU_937 (unclassified)     | 0.00027560 | 0.00024420 | 0.00000000 | 0.00000000 | 0.00000000 | 0.00000000 |
| OTU_938 (unclassified)     | 0.00000000 | 0.00024420 | 0.00000000 | 0.00000000 | 0.00000000 | 0.00000000 |
| OTU_939 (Rothia)           | 0.00000000 | 0.00016280 | 0.00000000 | 0.00000000 | 0.00000000 | 0.00000000 |
| OTU_940 (unclassified)     | 0.00000000 | 0.00016280 | 0.00013864 | 0.00000000 | 0.00000000 | 0.00000000 |
| OTU_941 (unclassified)     | 0.00000000 | 0.00032560 | 0.00000000 | 0.00000000 | 0.00000000 | 0.00000000 |
| OTU_942 (unclassified)     | 0.00000000 | 0.00016280 | 0.00000000 | 0.00000000 | 0.00000000 | 0.00000000 |
| OTU_943 (Brevundimonas)    | 0.00000000 | 0.00008140 | 0.00027728 | 0.00007309 | 0.00008712 | 0.00023904 |
| OTU_944 (unclassified)     | 0.00000000 | 0.00032560 | 0.00000000 | 0.00000000 | 0.00000000 | 0.00000000 |
| OTU_945 (unclassified)     | 0.00000000 | 0.00032560 | 0.00000000 | 0.00000000 | 0.00000000 | 0.00000000 |
| OTU_946 (unclassified)     | 0.00000000 | 0.00040700 | 0.00000000 | 0.00000000 | 0.00000000 | 0.00000000 |
| OTU_947 (unclassified)     | 0.00000000 | 0.00024420 | 0.00000000 | 0.00000000 | 0.00000000 | 0.00000000 |
| OTU_948 (unclassified)     | 0.00000000 | 0.00032560 | 0.00000000 | 0.00000000 | 0.00000000 | 0.00007968 |
| OTU_949 (unclassified)     | 0.00000000 | 0.00024420 | 0.00000000 | 0.00000000 | 0.00000000 | 0.00000000 |
| OTU_950 (unclassified)     | 0.00000000 | 0.00032560 | 0.00006932 | 0.00021928 | 0.00026135 | 0.00000000 |
| OTU_951 (unclassified)     | 0.00000000 | 0.00016280 | 0.00000000 | 0.00000000 | 0.00000000 | 0.00000000 |
| OTU_952 (unclassified)     | 0.00000000 | 0.00000000 | 0.00020796 | 0.00000000 | 0.00017423 | 0.00000000 |

|                                       |            |            |            |            |            |            |
|---------------------------------------|------------|------------|------------|------------|------------|------------|
| OTU_953 (Rothia)                      | 0.00000000 | 0.00000000 | 0.00000000 | 0.00014619 | 0.00026135 | 0.00000000 |
| OTU_954 (unclassified)                | 0.00000000 | 0.00032560 | 0.00055455 | 0.00014619 | 0.00000000 | 0.00015936 |
| OTU_955 (unclassified)                | 0.00000000 | 0.00000000 | 0.00013864 | 0.00036547 | 0.00000000 | 0.00000000 |
| OTU_956 (unclassified)                | 0.00000000 | 0.00024420 | 0.00000000 | 0.00000000 | 0.00000000 | 0.00000000 |
| OTU_957 (unclassified)                | 0.00000000 | 0.00032560 | 0.00000000 | 0.00000000 | 0.00000000 | 0.00000000 |
| OTU_958 (unclassified)                | 0.00000000 | 0.00024420 | 0.00020796 | 0.00007309 | 0.00000000 | 0.00071713 |
| OTU_959 (Cellulosilyticum)            | 0.00000000 | 0.00032560 | 0.00000000 | 0.00000000 | 0.00000000 | 0.00000000 |
| OTU_960 (Lactococcus)                 | 0.00000000 | 0.00048840 | 0.00006932 | 0.00029238 | 0.00008712 | 0.00039841 |
| OTU_961 (unclassified)                | 0.00000000 | 0.00024420 | 0.00000000 | 0.00000000 | 0.00000000 | 0.00000000 |
| OTU_962 (unclassified)                | 0.00000000 | 0.00073260 | 0.00000000 | 0.00000000 | 0.00000000 | 0.00000000 |
| OTU_963<br>(OD1_genus_incertae_sedis) | 0.00000000 | 0.00032560 | 0.00000000 | 0.00000000 | 0.00000000 | 0.00000000 |
| OTU_964 (Microbacterium)              | 0.00013780 | 0.00016280 | 0.00013864 | 0.00000000 | 0.00000000 | 0.00000000 |
| OTU_965 (unclassified)                | 0.00000000 | 0.00073260 | 0.00013864 | 0.00007309 | 0.00000000 | 0.00000000 |
| OTU_966 (unclassified)                | 0.00000000 | 0.00016280 | 0.00000000 | 0.00000000 | 0.00000000 | 0.00000000 |
| OTU_967 (Leadbetterella)              | 0.00000000 | 0.00000000 | 0.00013864 | 0.00000000 | 0.00000000 | 0.00000000 |
| OTU_968 (unclassified)                | 0.00000000 | 0.00032560 | 0.00000000 | 0.00007309 | 0.00017423 | 0.00031873 |
| OTU_969 (unclassified)                | 0.00000000 | 0.00024420 | 0.00000000 | 0.00007309 | 0.00000000 | 0.00000000 |
| OTU_970 (Mycobacterium)               | 0.00000000 | 0.00016280 | 0.00000000 | 0.00000000 | 0.00000000 | 0.00000000 |
| OTU_971 (unclassified)                | 0.00000000 | 0.00032560 | 0.00000000 | 0.00000000 | 0.00000000 | 0.00000000 |
| OTU_972                               | 0.00000000 | 0.00048840 | 0.00000000 | 0.00000000 | 0.00017423 | 0.00023904 |
| OTU_973 (Treponema)                   | 0.00000000 | 0.00016280 | 0.00000000 | 0.00000000 | 0.00000000 | 0.00000000 |
| OTU_974 (unclassified)                | 0.00000000 | 0.00040700 | 0.00000000 | 0.00000000 | 0.00000000 | 0.00000000 |
| OTU_975 (unclassified)                | 0.00000000 | 0.00056980 | 0.00013864 | 0.00007309 | 0.00000000 | 0.00007968 |
| OTU_976 (unclassified)                | 0.00000000 | 0.00024420 | 0.00000000 | 0.00000000 | 0.00000000 | 0.00000000 |
| OTU_977 (unclassified)                | 0.00000000 | 0.00000000 | 0.00000000 | 0.00014619 | 0.00000000 | 0.00007968 |
| OTU_978 (unclassified)                | 0.00000000 | 0.00065120 | 0.00000000 | 0.00000000 | 0.00000000 | 0.00000000 |
| OTU_979 (Acinetobacter)               | 0.00000000 | 0.00065120 | 0.00000000 | 0.00043856 | 0.00017423 | 0.00007968 |
| OTU_980 (unclassified)                | 0.00000000 | 0.00040700 | 0.00000000 | 0.00000000 | 0.00000000 | 0.00007968 |
| OTU_981 (unclassified)                | 0.00000000 | 0.00024420 | 0.00000000 | 0.00007309 | 0.00000000 | 0.00007968 |
| OTU_982 (Turneriella)                 | 0.00000000 | 0.00016280 | 0.00000000 | 0.00014619 | 0.00000000 | 0.00000000 |
| OTU_983 (unclassified)                | 0.00000000 | 0.00016280 | 0.00000000 | 0.00007309 | 0.00000000 | 0.00000000 |
| OTU_984 (unclassified)                | 0.00000000 | 0.00024420 | 0.00000000 | 0.00000000 | 0.00000000 | 0.00000000 |
| OTU_985 (unclassified)                | 0.00000000 | 0.00016280 | 0.00000000 | 0.00000000 | 0.00000000 | 0.00000000 |
| OTU_986 (unclassified)                | 0.00000000 | 0.00024420 | 0.00000000 | 0.00000000 | 0.00000000 | 0.00000000 |
| OTU_987 (unclassified)                | 0.00000000 | 0.00056980 | 0.00013864 | 0.00021928 | 0.00000000 | 0.00007968 |
| OTU_988 (unclassified)                | 0.00000000 | 0.00024420 | 0.00000000 | 0.00000000 | 0.00000000 | 0.00000000 |
| OTU_989 (unclassified)                | 0.00000000 | 0.00024420 | 0.00000000 | 0.00000000 | 0.00000000 | 0.00000000 |
| OTU_990 (unclassified)                | 0.00000000 | 0.00032560 | 0.00000000 | 0.00000000 | 0.00000000 | 0.00000000 |
| OTU_991 (unclassified)                | 0.00000000 | 0.00000000 | 0.00006932 | 0.00095022 | 0.00017423 | 0.00000000 |
| OTU_992 (unclassified)                | 0.00000000 | 0.00081400 | 0.00020796 | 0.00014619 | 0.00008712 | 0.00007968 |
| OTU_993 (Sphingopyxis)                | 0.00000000 | 0.00056980 | 0.00000000 | 0.00000000 | 0.00000000 | 0.00000000 |
| OTU_994 (unclassified)                | 0.00000000 | 0.00048840 | 0.00000000 | 0.00000000 | 0.00000000 | 0.00000000 |
| OTU_995 (unclassified)                | 0.00000000 | 0.00032560 | 0.00000000 | 0.00000000 | 0.00000000 | 0.00000000 |
| OTU_996 (unclassified)                | 0.00000000 | 0.00048840 | 0.00000000 | 0.00000000 | 0.00000000 | 0.00000000 |
| OTU_997 (unclassified)                | 0.00000000 | 0.00056980 | 0.00000000 | 0.00000000 | 0.00000000 | 0.00000000 |
| OTU_998 (unclassified)                | 0.00000000 | 0.00024420 | 0.00000000 | 0.00000000 | 0.00000000 | 0.00000000 |
| OTU_999 (unclassified)                | 0.00000000 | 0.00016280 | 0.00020796 | 0.00000000 | 0.00000000 | 0.00000000 |
| OTU_1000 (Ohtaekwangia)               | 0.00000000 | 0.00048840 | 0.00000000 | 0.00000000 | 0.00000000 | 0.00000000 |
| OTU_1001 (unclassified)               | 0.00000000 | 0.00016280 | 0.00000000 | 0.00000000 | 0.00000000 | 0.00000000 |
| OTU_1002 (unclassified)               | 0.00000000 | 0.00040700 | 0.00013864 | 0.00000000 | 0.00000000 | 0.00000000 |

|                                        |            |            |            |            |            |            |
|----------------------------------------|------------|------------|------------|------------|------------|------------|
| OTU_1003 (unclassified)                | 0.00000000 | 0.00016280 | 0.00000000 | 0.00000000 | 0.00000000 | 0.00000000 |
| OTU_1004 (unclassified)                | 0.00000000 | 0.00024420 | 0.00000000 | 0.00000000 | 0.00008712 | 0.00000000 |
| OTU_1005 (Legionella)                  | 0.00000000 | 0.00024420 | 0.00000000 | 0.00000000 | 0.00017423 | 0.00000000 |
| OTU_1006 (unclassified)                | 0.00000000 | 0.00000000 | 0.00020796 | 0.00000000 | 0.00000000 | 0.00000000 |
| OTU_1007 (unclassified)                | 0.00000000 | 0.00032560 | 0.00000000 | 0.00000000 | 0.00008712 | 0.00000000 |
| OTU_1008 (Sphingomonas)                | 0.00000000 | 0.00040700 | 0.00000000 | 0.00000000 | 0.00000000 | 0.00000000 |
| OTU_1009 (unclassified)                | 0.00000000 | 0.00056980 | 0.00006932 | 0.00029238 | 0.00017423 | 0.00015936 |
| OTU_1010 (unclassified)                | 0.00000000 | 0.00000000 | 0.00034660 | 0.00007309 | 0.00000000 | 0.00000000 |
| OTU_1011 (unclassified)                | 0.00000000 | 0.00048840 | 0.00000000 | 0.00000000 | 0.00000000 | 0.00000000 |
| OTU_1012 (Inhella)                     | 0.00000000 | 0.00016280 | 0.00013864 | 0.00014619 | 0.00000000 | 0.00000000 |
| OTU_1013 (unclassified)                | 0.00000000 | 0.00024420 | 0.00000000 | 0.00000000 | 0.00000000 | 0.00000000 |
| OTU_1014 (unclassified)                | 0.00000000 | 0.00016280 | 0.00000000 | 0.00000000 | 0.00000000 | 0.00000000 |
| OTU_1015 (unclassified)                | 0.00000000 | 0.00032560 | 0.00000000 | 0.00000000 | 0.00000000 | 0.00000000 |
| OTU_1016 (unclassified)                | 0.00000000 | 0.00081400 | 0.00027728 | 0.00000000 | 0.00000000 | 0.00007968 |
| OTU_1017 (unclassified)                | 0.00000000 | 0.00000000 | 0.00000000 | 0.00000000 | 0.00043558 | 0.00015936 |
| OTU_1018 (unclassified)                | 0.00000000 | 0.00024420 | 0.00027728 | 0.00000000 | 0.00000000 | 0.00007968 |
| OTU_1019 (Polaromonas)                 | 0.00000000 | 0.00024420 | 0.00000000 | 0.00000000 | 0.00000000 | 0.00000000 |
| OTU_1020 (Ferruginibacter)             | 0.00000000 | 0.00016280 | 0.00000000 | 0.00007309 | 0.00000000 | 0.00000000 |
| OTU_1021 (unclassified)                | 0.00000000 | 0.00016280 | 0.00000000 | 0.00000000 | 0.00000000 | 0.00000000 |
| OTU_1022 (unclassified)                | 0.00000000 | 0.00048840 | 0.00000000 | 0.00014619 | 0.00000000 | 0.00000000 |
| OTU_1023 (unclassified)                | 0.00000000 | 0.00016280 | 0.00020796 | 0.00029238 | 0.00017423 | 0.00023904 |
| OTU_1024 (unclassified)                | 0.00000000 | 0.00040700 | 0.00000000 | 0.00007309 | 0.00000000 | 0.00000000 |
| OTU_1025 (unclassified)                | 0.00000000 | 0.00024420 | 0.00000000 | 0.00000000 | 0.00000000 | 0.00000000 |
| OTU_1026 (unclassified)                | 0.00000000 | 0.00032560 | 0.00000000 | 0.00000000 | 0.00000000 | 0.00000000 |
| OTU_1027 (Yersinia)                    | 0.00000000 | 0.00032560 | 0.00013864 | 0.00000000 | 0.00000000 | 0.00007968 |
| OTU_1028 (unclassified)                | 0.00000000 | 0.00024420 | 0.00000000 | 0.00029238 | 0.00008712 | 0.00031873 |
| OTU_1029<br>(TM7_genus_incertae_sedis) | 0.00000000 | 0.00073260 | 0.00000000 | 0.00000000 | 0.00000000 | 0.00000000 |
| OTU_1030 (unclassified)                | 0.00000000 | 0.00008140 | 0.00013864 | 0.00000000 | 0.00000000 | 0.00007968 |
| OTU_1031 (Methylobacterium)            | 0.00000000 | 0.00000000 | 0.00000000 | 0.00021928 | 0.00026135 | 0.00015936 |
| OTU_1032 (unclassified)                | 0.00000000 | 0.00000000 | 0.00013864 | 0.00000000 | 0.00008712 | 0.00007968 |
| OTU_1033 (unclassified)                | 0.00000000 | 0.00040700 | 0.00000000 | 0.00000000 | 0.00000000 | 0.00000000 |
| OTU_1034 (unclassified)                | 0.00000000 | 0.00024420 | 0.00000000 | 0.00000000 | 0.00000000 | 0.00000000 |
| OTU_1035 (Geobacillus)                 | 0.00000000 | 0.00073260 | 0.00041592 | 0.00190045 | 0.00243924 | 0.00247012 |
| OTU_1036 (unclassified)                | 0.00000000 | 0.00000000 | 0.00000000 | 0.00000000 | 0.00043558 | 0.00031873 |
| OTU_1037 (unclassified)                | 0.00000000 | 0.00000000 | 0.00020796 | 0.00000000 | 0.00000000 | 0.00000000 |
| OTU_1038 (unclassified)                | 0.00000000 | 0.00000000 | 0.00013864 | 0.00000000 | 0.00000000 | 0.00000000 |
| OTU_1039 (unclassified)                | 0.00000000 | 0.00032560 | 0.00000000 | 0.00000000 | 0.00000000 | 0.00000000 |
| OTU_1040 (unclassified)                | 0.00000000 | 0.00056980 | 0.00000000 | 0.00000000 | 0.00000000 | 0.00000000 |
| OTU_1041 (unclassified)                | 0.00000000 | 0.00073260 | 0.00000000 | 0.00000000 | 0.00000000 | 0.00000000 |
| OTU_1042 (unclassified)                | 0.00000000 | 0.00016280 | 0.00000000 | 0.00000000 | 0.00000000 | 0.00000000 |
| OTU_1043 (unclassified)                | 0.00000000 | 0.00016280 | 0.00000000 | 0.00000000 | 0.00000000 | 0.00000000 |
| OTU_1044 (Brevundimonas)               | 0.00020670 | 0.00000000 | 0.00055455 | 0.00021928 | 0.00017423 | 0.00039841 |
| OTU_1045 (unclassified)                | 0.00000000 | 0.00000000 | 0.00000000 | 0.00007309 | 0.00000000 | 0.00015936 |
| OTU_1046 (unclassified)                | 0.00000000 | 0.00016280 | 0.00013864 | 0.00000000 | 0.00000000 | 0.00000000 |
| OTU_1047 (unclassified)                | 0.00000000 | 0.00040700 | 0.00000000 | 0.00000000 | 0.00000000 | 0.00000000 |
| OTU_1048 (unclassified)                | 0.00000000 | 0.00048840 | 0.00000000 | 0.00000000 | 0.00000000 | 0.00000000 |
| OTU_1049 (Leadbetterella)              | 0.00000000 | 0.00016280 | 0.00041592 | 0.00000000 | 0.00008712 | 0.00015936 |
| OTU_1050 (unclassified)                | 0.00000000 | 0.00032560 | 0.00000000 | 0.00000000 | 0.00000000 | 0.00000000 |
| OTU_1051 (Methylothera)                | 0.00000000 | 0.00056980 | 0.00000000 | 0.00000000 | 0.00000000 | 0.00000000 |
| OTU_1052 (unclassified)                | 0.00000000 | 0.00016280 | 0.00000000 | 0.00000000 | 0.00000000 | 0.00000000 |

|                                        |            |            |            |            |            |            |
|----------------------------------------|------------|------------|------------|------------|------------|------------|
| OTU_1053<br>(TM7_genus_incertae_sedis) | 0.00000000 | 0.00040700 | 0.00013864 | 0.00000000 | 0.00000000 | 0.00000000 |
| OTU_1054 (unclassified)                | 0.00000000 | 0.00000000 | 0.00041592 | 0.00000000 | 0.00008712 | 0.00000000 |
| OTU_1055 (Methylobacterium)            | 0.00000000 | 0.00000000 | 0.00027728 | 0.00007309 | 0.00008712 | 0.00007968 |
| OTU_1056 (unclassified)                | 0.00000000 | 0.00000000 | 0.00020796 | 0.00000000 | 0.00000000 | 0.00000000 |
| OTU_1057 (Flavobacterium)              | 0.00000000 | 0.00040700 | 0.00055455 | 0.00021928 | 0.00000000 | 0.00007968 |
| OTU_1058 (unclassified)                | 0.00000000 | 0.00016280 | 0.00041592 | 0.00000000 | 0.00008712 | 0.00031873 |
| OTU_1059 (Clostridium_XI)              | 0.00000000 | 0.00000000 | 0.00000000 | 0.00021928 | 0.00043558 | 0.00000000 |
| OTU_1060 (Microlunatus)                | 0.00000000 | 0.00000000 | 0.00020796 | 0.00000000 | 0.00017423 | 0.00007968 |
| OTU_1061 (unclassified)                | 0.00000000 | 0.00000000 | 0.00034660 | 0.00000000 | 0.00008712 | 0.00007968 |
| OTU_1062 (Geobacillus)                 | 0.00000000 | 0.00000000 | 0.00006932 | 0.00014619 | 0.00034846 | 0.00007968 |
| OTU_1063 (unclassified)                | 0.00000000 | 0.00000000 | 0.00006932 | 0.00000000 | 0.00226501 | 0.00000000 |
| OTU_1064 (unclassified)                | 0.00000000 | 0.00000000 | 0.00013864 | 0.00000000 | 0.00000000 | 0.00000000 |
| OTU_1065 (unclassified)                | 0.00000000 | 0.00000000 | 0.00041592 | 0.00051166 | 0.00000000 | 0.00007968 |
| OTU_1066 (unclassified)                | 0.00000000 | 0.00000000 | 0.00020796 | 0.00000000 | 0.00000000 | 0.00015936 |
| OTU_1067 (unclassified)                | 0.00000000 | 0.00000000 | 0.00020796 | 0.00000000 | 0.00000000 | 0.00015936 |
| OTU_1068 (unclassified)                | 0.00000000 | 0.00000000 | 0.00013864 | 0.00000000 | 0.00000000 | 0.00000000 |
| OTU_1069 (unclassified)                | 0.00000000 | 0.00000000 | 0.00034660 | 0.00000000 | 0.00000000 | 0.00000000 |
| OTU_1070 (Nubsella)                    | 0.00000000 | 0.00000000 | 0.00055455 | 0.00043856 | 0.00008712 | 0.00015936 |
| OTU_1071 (unclassified)                | 0.00000000 | 0.00000000 | 0.00041592 | 0.00000000 | 0.00000000 | 0.00007968 |
| OTU_1072 (unclassified)                | 0.00000000 | 0.00000000 | 0.00020796 | 0.00007309 | 0.00000000 | 0.00015936 |
| OTU_1073 (Ferruginibacter)             | 0.00000000 | 0.00000000 | 0.00013864 | 0.00000000 | 0.00000000 | 0.00000000 |
| OTU_1074<br>(SR1_genus_incertae_sedis) | 0.00000000 | 0.00000000 | 0.00027728 | 0.00000000 | 0.00000000 | 0.00000000 |
| OTU_1075 (unclassified)                | 0.00000000 | 0.00008140 | 0.00041592 | 0.00080403 | 0.00026135 | 0.00007968 |
| OTU_1076 (unclassified)                | 0.00000000 | 0.00000000 | 0.00027728 | 0.00000000 | 0.00000000 | 0.00000000 |
| OTU_1077                               | 0.00000000 | 0.00065120 | 0.00000000 | 0.00000000 | 0.00000000 | 0.00007968 |
| OTU_1078 (unclassified)                | 0.00000000 | 0.00008140 | 0.00062387 | 0.00087713 | 0.00000000 | 0.00000000 |
| OTU_1079 (unclassified)                | 0.00000000 | 0.00000000 | 0.00034660 | 0.00000000 | 0.00000000 | 0.00015936 |
| OTU_1080 (unclassified)                | 0.00000000 | 0.00000000 | 0.00041592 | 0.00029238 | 0.00017423 | 0.00007968 |
| OTU_1081 (unclassified)                | 0.00000000 | 0.00000000 | 0.00013864 | 0.00000000 | 0.00000000 | 0.00000000 |
| OTU_1082 (unclassified)                | 0.00000000 | 0.00040700 | 0.00055455 | 0.00014619 | 0.00000000 | 0.00023904 |
| OTU_1083 (unclassified)                | 0.00000000 | 0.00000000 | 0.00055455 | 0.00000000 | 0.00000000 | 0.00023904 |
| OTU_1084 (unclassified)                | 0.00000000 | 0.00016280 | 0.00020796 | 0.00007309 | 0.00026135 | 0.00007968 |
| OTU_1085 (unclassified)                | 0.00000000 | 0.00000000 | 0.00034660 | 0.00000000 | 0.00000000 | 0.00000000 |
| OTU_1086 (Zoogloea)                    | 0.00000000 | 0.00040700 | 0.00013864 | 0.00000000 | 0.00000000 | 0.00000000 |
| OTU_1087 (Microbacterium)              | 0.00000000 | 0.00000000 | 0.00041592 | 0.00000000 | 0.00000000 | 0.00000000 |
| OTU_1088 (Leptotrichia)                | 0.00000000 | 0.00008140 | 0.00034660 | 0.00000000 | 0.00026135 | 0.00015936 |
| OTU_1089 (unclassified)                | 0.00000000 | 0.00000000 | 0.00000000 | 0.00000000 | 0.00017423 | 0.00000000 |
| OTU_1090 (unclassified)                | 0.00000000 | 0.00000000 | 0.00020796 | 0.00014619 | 0.00008712 | 0.00015936 |
| OTU_1091 (Streptococcus)               | 0.00000000 | 0.00040700 | 0.00000000 | 0.00021928 | 0.00017423 | 0.00015936 |
| OTU_1092 (unclassified)                | 0.00013780 | 0.00000000 | 0.00020796 | 0.00095022 | 0.00008712 | 0.00007968 |
| OTU_1093 (Mycobacterium)               | 0.00000000 | 0.00008140 | 0.00027728 | 0.00000000 | 0.00000000 | 0.00015936 |
| OTU_1094 (Veillonella)                 | 0.00027560 | 0.00000000 | 0.00048523 | 0.00007309 | 0.00000000 | 0.00000000 |
| OTU_1095 (unclassified)                | 0.00000000 | 0.00000000 | 0.00013864 | 0.00014619 | 0.00000000 | 0.00015936 |
| OTU_1096 (unclassified)                | 0.00000000 | 0.00000000 | 0.00020796 | 0.00000000 | 0.00000000 | 0.00047809 |
| OTU_1097 (unclassified)                | 0.00000000 | 0.00000000 | 0.00013864 | 0.00000000 | 0.00000000 | 0.00000000 |
| OTU_1098 (Leadbetterella)              | 0.00000000 | 0.00000000 | 0.00027728 | 0.00007309 | 0.00000000 | 0.00015936 |
| OTU_1099 (unclassified)                | 0.00000000 | 0.00000000 | 0.00020796 | 0.00000000 | 0.00000000 | 0.00000000 |
| OTU_1100<br>(OD1_genus_incertae_sedis) | 0.00000000 | 0.00008140 | 0.00020796 | 0.00000000 | 0.00000000 | 0.00000000 |

|                         |            |            |            |            |            |            |
|-------------------------|------------|------------|------------|------------|------------|------------|
| OTU_1101 (unclassified) | 0.00000000 | 0.00000000 | 0.00034660 | 0.00036547 | 0.00000000 | 0.00031873 |
| OTU_1102 (unclassified) | 0.00000000 | 0.00000000 | 0.00013864 | 0.00021928 | 0.00000000 | 0.00000000 |
| OTU_1103 (unclassified) | 0.00000000 | 0.00000000 | 0.00048523 | 0.00000000 | 0.00017423 | 0.00031873 |
| OTU_1104 (unclassified) | 0.00000000 | 0.00000000 | 0.00034660 | 0.00014619 | 0.00060981 | 0.00015936 |
| OTU_1105 (unclassified) | 0.00000000 | 0.00000000 | 0.00020796 | 0.00000000 | 0.00000000 | 0.00007968 |
